# Supplementary material for: Oenological traits of Lachancea thermotolerans show signs of domestication and allopatric differentiation
Source: PubMed Central journal article supplement (PMC6172252; doi:10.1038/s41598-018-33105-7), 2018-10-04
Supplement: 41598_2018_33105_MOESM1_ESM.pdf [file 41598_2018_33105_MOESM1_ESM.pdf]

## *Supplementary Information*

### **Oenological traits of *Lachancea thermotolerans* show signs of domestication and allopatric differentiation**

**Ana Hranilovic<sup>1,2</sup>, Joanna M. Gambetta<sup>3</sup>, Leigh Schmidtke<sup>1,3</sup>, Paul K. Boss<sup>4</sup>, Paul R. Grbin<sup>2</sup>, Isabelle Masneuf-Pomarede<sup>5,6</sup>, Marina Bely<sup>5</sup>, Warren Albertin<sup>5,7</sup>, Vladimir Jiranek<sup>1,2\*</sup>**

<sup>1</sup> The Australian Research Council Training Centre for Innovative Wine Production, Adelaide, SA, Australia

<sup>2</sup> Department of Wine and Food Science, The University of Adelaide, Adelaide, SA, Australia

<sup>3</sup> National Wine and Grape Industry Centre, School of Agricultural and Wine Science, Charles Sturt University, Wagga Wagga, NSW, Australia

<sup>4</sup> CSIRO Agriculture and Food, Adelaide, SA, Australia

<sup>5</sup> Unité de recherche Œnologie, Institut de la Science de la Vigne et du Vin, University of Bordeaux, Villenave d'Ornon, France

<sup>6</sup> Bordeaux Sciences Agro, Gradignan, France

<sup>7</sup> ENSCBP, Bordeaux INP, Pessac, France

#### **\* Correspondence**

Vladimir Jiranek

vladimir.jiranek@adelaide.edu.au

**Supplementary Table 1. List of the studied *L. thermotolerans* strains.** Strains of different geographic and isolation niches were divided into nine genetic groups according to Hranilovic et al. (2017).

| Strain    | Source                 | Isolation location            | Isolation niche                                                 | Genetic group            | References |
|-----------|------------------------|-------------------------------|-----------------------------------------------------------------|--------------------------|------------|
| 11/2-112  | University of Debrecen | Slovakia, Mala Trna           | grapes, mummified                                               | Mix Europe/N. America    | 2, 5       |
| 11/Z-1    | University of Debrecen | Slovakia, Mala Trna           | grapes, mummified                                               | Mix Europe/N. America    | 2, 5       |
| 14/1/Z-2  | University of Debrecen | Hungary, Erdőbénye            | grapes, mummified                                               | Mix E. Europe            | 2, 5       |
| 2/2/Z-8   | University of Debrecen | Hungary, Sáradsadány          | grapes, mummified                                               | Mix Europe/N. America    | 2, 5       |
| 5/1/Z-7   | University of Debrecen | Hungary, Vinicky              | grapes, mummified                                               | Mix Europe/N. America    | 2, 5       |
| 50-15     | Phaff YCC              | USA, California               | <i>Drosophila pseudoobscura</i>                                 | Americas                 | 2          |
| 51-160    | Phaff YCC              | USA, California               | <i>Drosophila azteca</i>                                        | Americas                 | 2          |
| 51-171    | Phaff YCC              | USA, California               | <i>Drosophila pseudoobscura</i>                                 | Hawaii/California        | 2          |
| 60-260    | Phaff YCC              | USA, California               | <i>Aulacigaster sp.</i> on <i>Ulmus carpinifolia</i><br>exudate | Americas                 | 2          |
| 61-245    | Phaff YCC              | USA, California               | <i>Aulacigaster sp.</i>                                         | Americas                 | 2          |
| 61-518    | Phaff YCC              | USA, California               | <i>Drosophila melanogaster</i>                                  | Americas                 | 2          |
| 68-140    | Phaff YCC              | USA, California               | bees                                                            | Hawaii/California        | 2          |
| 72-132    | Phaff YCC              | Hawaii, Ahumoa                | <i>Myoporum sandwicense</i> exudate                             | Hawaii/California        | 2          |
| 72-137    | Phaff YCC              | Hawaii, Ahumoa                | <i>Myoporum sandwicense</i> exudate                             | Hawaii/California        | 2          |
| 8/2/Z-3   | University of Debrecen | Slovakia, Černochoch          | grapes, mummified                                               | Mix Europe/N. America    | 2, 5       |
| 8/Z-1     | University of Debrecen | Slovakia, Černochoch          | grapes, mummified                                               | Mix E. Europe            | 2, 5       |
| 9/1/Z-4   | University of Debrecen | Slovakia, Mala Trna           | grapes, mummified                                               | Mix E. Europe            | 2, 5       |
| AWRI 2009 | AWMCC                  | Australia, South<br>Australia | grapes                                                          | Domestic 1               | 2          |
| CBS 10516 | CBS-KNAW               | Ukraine                       | <i>Quercus sp.</i> exudate                                      | Europe oak/France grapes | 2          |

|             |                    |                         |                            |                          |         |
|-------------|--------------------|-------------------------|----------------------------|--------------------------|---------|
| CBS 10517   | CBS-KNAW           | Ukraine                 | <i>Quercus sp.</i> exudate | Other                    | 2       |
| CBS 10518   | CBS-KNAW           | Ukraine                 | <i>Quercus sp.</i> exudate | Mix E. Europe            | 2       |
| CBS 137     | CBS-KNAW           | Netherlands             | date                       | Domestic 1               | 1, 2    |
| CBS 2860    | CBS-KNAW           | Italy, Sardinia         | grape must                 | Domestic 1               | 1, 2    |
| CBS 2907    | CBS-KNAW           | South Africa            | soil                       | Domestic 2               | 1, 2    |
| CBS 5464    | CBS-KNAW           | Australia               | cotton seed                | Hawaii/California        | 2       |
| CBS 6292    | CBS-KNAW           | Australia               | na                         | Europe oak/France grapes | 2       |
| CBS 6340T   | CBS-KNAW           | Russia                  | mirabelle plum conserve    | Domestic 1               | 1, 2, 3 |
| CBS 6467    | CBS-KNAW           | Japan                   | tree exudate               | Other                    | 2       |
| CBS 7772    | CBS-KNAW           | Brazil                  | <i>Uca sp.</i>             | Americas                 | 1, 2    |
| CL 41       | University of Leon | Spain                   | grapes                     | Domestic 2               | 2       |
| CL 43       | University of Leon | Spain                   | grapes                     | Hawaii/California        | 2       |
| CONCERTO™   | CHR Hansen         | 'Mediterranean country' | na                         | Domestic 1               | 2       |
| CRBO L0672  | CRBOeno            | France, Bordeaux        | grapes, fermentation       | Mix Europe/N. America    | 2       |
| DBVPG 10092 | DBVPG              | Algeria                 | soil, apple orchard        | Domestic 2               | 2       |
| DBVPG 2551  | DBVPG              | Italy, Piemonte         | wine cv. Barbera           | Domestic 2               | 1, 2    |
| DBVPG 2700  | DBVPG              | Spain, La Mancha        | grapes cv. Airen           | Mix Europe/N. America    | 1, 2    |
| DBVPG 3464  | DBVPG              | Spain, La Mancha        | grapes                     | Domestic 1               | 1, 2    |
| DBVPG 3466  | DBVPG              | Spain, La Mancha        | grapes                     | Domestic 1               | 1, 2    |
| DBVPG 3469  | DBVPG              | Spain, La Mancha        | grapes                     | Mix Europe/N. America    | 1, 2    |
| DBVPG 4035  | DBVPG              | ex Yugoslavia           | grapes, must               | Domestic 1               | 1, 2    |
| DBVPG 6322  | DBVPG              | Italy                   | grapes                     | Domestic 2               | 2       |
| DBVPG 6326  | DBVPG              | Italy                   | grapes, raisins            | Domestic 2               | 2       |
| Fin. 89-2   | na                 | Finland                 | <i>Quercus sp.</i> exudate | Europe oak/France grapes | 1, 2, 3 |
| FRI10C.1    | NCYC               | UK, Fritham             | <i>Quercus sp.</i>         | Europe oak/France grapes | 2, 4    |
| HU 2511     | BOKU               | Austria                 | grapes                     | Domestic 2               | 2       |

|                   |          |                       |                                                      |                          |      |
|-------------------|----------|-----------------------|------------------------------------------------------|--------------------------|------|
| ISVV Ltyq25       | ISVV     | France, Sauternes     | grapes, high sugar must                              | Europe oak/France grapes | 2    |
| ISVV Ltyq3        | ISVV     | France, Sauternes     | grapes, high sugar must                              | Europe oak/France grapes | 2    |
| ISVV Ltyq36       | ISVV     | France, Sauternes     | grapes, high sugar must                              | Europe oak/France grapes | 2    |
| JCB1              | ISVV     | France, Sauternes     | grapes, high sugar must                              | Domestic 1               | 2    |
| KEH.34.B.3        | na       | USA, Missouri         | grapes, fermentation                                 | Canada trees             | 1, 2 |
| LEVULIA® ALCOMENO | AEB      | France, Burgundy      | grapes, fermentation                                 | Europe oak/France grapes | 2    |
| LL12-031          | LL       | Canada                | <i>Quercus sp.</i> tree bark                         | Canada trees             | 2    |
| LL12-040          | LL       | Canada                | <i>Acer sp.</i> bark                                 | Mix Europe/N. America    | 2    |
| LL12-041          | LL       | Canada                | <i>Quercus sp.</i> bark                              | Mix Europe/N. America    | 2    |
| LL12-056          | LL       | Canada                | planted <i>Quercus sp.</i> bark                      | Canada trees             | 2    |
| LL13-038          | LL       | USA, Massachusetts    | <i>Quercus sp.</i> bark                              | Mix Europe/N. America    | 2    |
| LL13-189          | LL       | Canada, New-Brunswick | <i>Quercus sp.</i> bark                              | Canada trees             | 2    |
| LL13-194          | LL       | Canada, New-Brunswick | <i>Quercus sp.</i> bark                              | Canada trees             | 2    |
| MB10D.1           | NCYC     | France, Montbarri     | <i>Quercus sp.</i>                                   | Europe oak/France grapes | 2, 4 |
| MUCL 31341        | MUCL     | Italy                 | wine                                                 | Domestic 1               | 1, 2 |
| MUCL 31342        | MUCL     | Italy                 | wine                                                 | Domestic 1               | 2    |
| MUCL 47720        | MUCL     | Italy                 | wine                                                 | Domestic 1               | 2    |
| NCAIM Y.00775     | NCAIM    | Hungary, Babat        | <i>Carpinus betulu</i> exudate                       | Mix Europe/N. America    | 2    |
| NCAIM Y.00798     | NCAIM    | Hungary, Csikóvára    | brown rotten <i>Quercus sp.</i>                      | Mix Europe/N. America    | 2    |
| NCAIM Y.00873     | NCAIM    | Hungary, Budapest     | rotten material of a cavity of <i>Betula pendula</i> | Mix E. Europe            | 2    |
| NCAIM Y.01703     | NCAIM    | Hungary, Nagyeged     | grapes                                               | Mix Europe/N. America    | 2    |
| NRLL Y-2193       | NRRL/ARS | USA, California       | <i>Drosophila pseudoobscura</i>                      | Americas                 | 2    |
| NRLL Y-27329      | NRRL/ARS | USA, West Virginia    | grapes                                               | Domestic 2               | 2    |

|                 |                               |                      |                                                  |                          |         |
|-----------------|-------------------------------|----------------------|--------------------------------------------------|--------------------------|---------|
| NZ156           | CRPR                          | New Zealand          | grapes cv. Chardonnay                            | Domestic 1               | 2       |
| OCK6C.1         | NCYC                          | UK, Ocknell          | <i>Quercus sp.</i>                               | Europe oak/France grapes | 2, 4    |
| OSU A           | OSU                           | USA, Oregon          | grapes                                           | Mix Europe/N. America    | 2       |
| PLU5B.1         | NCYC                          | UK, East Sussex      | <i>Quercus sp.</i>                               | Europe oak/France grapes | 2, 4    |
| PYR14B.1        | NCYC                          | Greece, Pyradikia    | <i>Quercus sp.</i>                               | Domestic 1               | 2, 4    |
| T 13/17 F       | University of the<br>Republic | Uruguay              | grapes cv. Tannat                                | Domestic 2               | 2       |
| TAX9D.1         | NCYC                          | Greece, Taxiarchis   | <i>Quercus sp.</i>                               | Mix Europe/N. America    | 2, 4    |
| UNIFG 16        | UNIFG                         | Italy                | wine                                             | Domestic 2               | 2       |
| UNIFG 17        | UNIFG                         | Italy                | wine                                             | Domestic 2               | 2       |
| UNIFG 18        | UNIFG                         | Italy                | wine                                             | Domestic 2               | 2       |
| UNIFG 22        | UNIFG                         | Italy                | wine                                             | Domestic 2               | 2       |
| UNIFG 26        | UNIFG                         | Italy                | wine                                             | Domestic 1               | 2       |
| UNIFG 28        | UNIFG                         | Italy                | wine                                             | Domestic 2               | 2       |
| UNIFG 32        | UNIFG                         | Italy                | wine                                             | Domestic 2               | 2       |
| UWOPS 79-110    | UWOPS                         | Canada, Ontario      | black knot, <i>Prunus virginiana</i>             | Canada trees             | 1, 2    |
| UWOPS 79-164    | UWOPS                         | Canada, Ontario      | black knot, <i>Prunus virginiana</i>             | Canada trees             | 1, 2    |
| UWOPS 79-195    | UWOPS                         | Canada, Ontario      | black knot, <i>Prunus virginiana</i>             | Canada trees             | 1, 2    |
| UWOPS 83-1097.1 | UWOPS                         | Cayman Islands       | black knot, <i>Prunus virginiana</i>             | Americas                 | 1, 2, 3 |
| UWOPS 83-1101.1 | UWOPS                         | Cayman Islands       | <i>Gitona americana, Opuntia stricta</i>         | Americas                 | 1, 2    |
| UWOPS 85-312.1  | UWOPS                         | USA, Arizona         | <i>Drosophila carbonaria, Prosopis juliflora</i> | Americas                 | 1, 2    |
| UWOPS 85-51.1   | UWOPS                         | USA, Florida         | <i>Opuntia cubensis</i>                          | Americas                 | 1, 2    |
| UWOPS 90-10.1   | UWOPS                         | Bahamas, Exumas Cays | Columnnar cactus                                 | Americas                 | 1, 2    |
| UWOPS 91-910.1  | UWOPS                         | Hawaii, Ahumoa       | flux (pink), <i>Myoporum</i>                     | Hawaii/California        | 1, 2    |
| UWOPS 91-912.1  | UWOPS                         | Hawaii, Ahumoa       | flux (white), <i>Myoporum</i>                    | Hawaii/California        | 1, 2    |
| UWOPS 94-426.2  | UWOPS                         | Mexico, Jalisco      | distillery, agave must                           | Domestic 1               | 1, 2    |

---

**Phaff YCC** – Phaff Yeast Culture Collection, University of California, Davis, USA; **AWMCC** – AWRI Wine Microorganism Culture Collection, Australia; **CBS-KNAW** – Centraalbureau voor Schimmelcultures – Koninklijke Nederlandse Akademie van Wetenschappen, Netherlands; **CRBOeno** - Centre de Ressources Biologiques OEnologie, France; **DBVPG** The Industrial Yeasts Collection DBVPG, Italy; **NCYC** – National Collection of Yeast Cultures, UK; Italy; **BOKU** – Universität für Bodenkultur Wien, Austria; **ISVV** – Institut des Sciences de la Vigne et du Vin, France; **LL** – Landry Lab, Canada; **MUCL** – Mycothèque de l’Université catholique de Louvain, Belgium; **NCAIM** – National Collection of Agricultural and Industrial Microorganisms, Hungary; **NRRL/ARS** – NRRL Agriculture Research Service Culture collection, USA; **CRPR** – Centre de Recherche Pernod-Ricard, France; **OSU** – Oregon State University, USA; **UNIFG** – University of Foggia; **UWOPS** – Culture Collection of the University of Western Ontario; na – not available; [1] Freil, K. C., Friedrich, A., Hou, J. & Schacherer, J. Population genomic analysis reveals highly conserved mitochondrial genomes in the yeast species *Lachancea thermotolerans*. *Genome Biol. Evol.* **6**, 2586-2594, doi:10.1093/gbe/evu203 (2014); [2] Hranilovic, A., Bely, M., Masneuf-Pomarede, I., Jiranek, V. & Albertin, W. The evolution of *Lachancea thermotolerans* is driven by geographical determination, anthropisation and flux between different ecosystems. *Plos One* **12**, e0184652, doi:10.1371/journal.pone.0184652 (2017); [3] Naumova, E. S., Serpova, E. V. & Naumov, G. I. Molecular systematics of *Lachancea* yeasts. *Biochemistry (Moscow)* **72**, 1356-1362 (2007); [4] Robinson, H. A., Pinharanda, A. & Bensasson, D. Summer temperature can predict the distribution of wild yeast populations. *Ecol. Evol.* **6**, 1236-1250 (2016); [5] Sipiczki, M. Overwintering of vineyard yeasts: Survival of interacting yeast communities in grapes mummified on vines. *Front. Microbiol.* **7**, 212, doi:10.3389/fmicb.2016.00212 (2016).

**Supplementary Table 2.** Analysed volatile compounds in *L. thermotolerans* wines displaying significant (p-value < 0.05) and non-significant strain effect divided into chemical classes. The tentative identification (TI) was accomplished via corresponding Kovats' retention indices (RI) obtained with an equivalent stationary phase (in italics) and/or mass spectra match scores  $\geq$  750, and confirmed (confirmed identification; CI) via comparison with pure compounds. The unknown compounds (no identification, NI) are numbered based on the chromatographic elution profile.

| No.                              | Compound                 | Formula                                        | CAS        | Kovats' RI              | Identification |
|----------------------------------|--------------------------|------------------------------------------------|------------|-------------------------|----------------|
| <i>Significant strain effect</i> |                          |                                                |            |                         |                |
| <b>Alcohols</b>                  |                          |                                                |            |                         |                |
| 1                                | butanol                  | C <sub>4</sub> H <sub>10</sub> O               | 71-36-3    | 1143                    | CI             |
| 2                                | isobutanol               | C <sub>4</sub> H <sub>10</sub> O               | 78-83-1    | 1089                    | CI             |
| 3                                | isoamyl alcohol          | C <sub>5</sub> H <sub>12</sub> O               | 123-51-3   | 1222                    | CI             |
| 4                                | 2-methyl-1-butanol       | C <sub>5</sub> H <sub>12</sub> O               | 137-32-6   | 1219                    | CI             |
| 5                                | hexanol                  | C <sub>6</sub> H <sub>14</sub> O               | 111-27-3   | 1349                    | CI             |
| 6                                | 3-methyl-1-pentanol      | C <sub>6</sub> H <sub>14</sub> O               | 589-35-5   | <i>1334<sup>b</sup></i> | TI             |
| 7                                | 2-ethyl-1-hexanol        | C <sub>8</sub> H <sub>18</sub> O               | 104-76-7   | <i>1483<sup>i</sup></i> | TI             |
| 8                                | octanol                  | C <sub>8</sub> H <sub>18</sub> O               | 111-87-5   | 1560                    | CI             |
| 9                                | 2-phenylethanol          | C <sub>8</sub> H <sub>10</sub> O               | 60-12-8    | 1901                    | CI             |
| 10                               | 4-methyl-benzenemethanol | C <sub>8</sub> H <sub>10</sub> O               | 589-18-4   | <i>1967<sup>a</sup></i> | TI             |
| 11                               | nonanol                  | C <sub>9</sub> H <sub>20</sub> O               | 143-08-8   | 1647                    | CI             |
| 12                               | decanol                  | C <sub>10</sub> H <sub>22</sub> O              | 112-30-1   | 1755                    | CI             |
| <b>Esters</b>                    |                          |                                                |            |                         |                |
| 13                               | ethyl acetate            | C <sub>4</sub> H <sub>8</sub> O <sub>2</sub>   | 141-78-6   | 882                     | CI             |
| 14                               | ethyl propanoate         | C <sub>5</sub> H <sub>10</sub> O <sub>2</sub>  | 105-37-3   | 954                     | CI             |
| 15                               | isobutyl acetate         | C <sub>6</sub> H <sub>12</sub> O <sub>2</sub>  | 110-19-0   | 1011                    | CI             |
| 16                               | isoamyl acetate          | C <sub>7</sub> H <sub>14</sub> O <sub>2</sub>  | 123-92-2   | 1111                    | CI             |
| 17                               | diethyl succinate        | C <sub>8</sub> H <sub>14</sub> O <sub>4</sub>  | 123-25-1   | 1670                    | CI             |
| 18                               | amyl lactate             | C <sub>8</sub> H <sub>16</sub> O <sub>3</sub>  | 6382-06-5  |                         | TI             |
| 19                               | 2-phenylethyl acetate    | C <sub>10</sub> H <sub>12</sub> O <sub>2</sub> | 103-45-7   | 1802                    | CI             |
| 20                               | ethyl octanoate          | C <sub>10</sub> H <sub>20</sub> O <sub>2</sub> | 106-32-1   | 1414                    | CI             |
| 21                               | ethyl decanoate          | C <sub>12</sub> H <sub>24</sub> O <sub>2</sub> | 110-38-3   | 1629                    | CI             |
| 22                               | ethyl 9-decenoate        | C <sub>12</sub> H <sub>22</sub> O <sub>2</sub> | 67233-91-4 | <i>1688<sup>b</sup></i> | TI             |

### Acids

|    |                         |                                                |          |      |    |
|----|-------------------------|------------------------------------------------|----------|------|----|
| 23 | 4-hydroxy-butanoic acid | C <sub>4</sub> H <sub>8</sub> O <sub>3</sub>   | 591-81-1 |      | TI |
| 24 | hexanoic acid           | C <sub>6</sub> H <sub>12</sub> O <sub>2</sub>  | 142-62-1 | 1860 | CI |
| 25 | octanoic acid           | C <sub>8</sub> H <sub>16</sub> O <sub>2</sub>  | 124-07-2 | 2076 | CI |
| 26 | decanoic acid           | C <sub>10</sub> H <sub>20</sub> O <sub>2</sub> | 334-48-5 | 2295 | CI |
| 27 | dodecanoic acid         | C <sub>12</sub> H <sub>24</sub> O <sub>2</sub> | 143-07-7 | 2488 | CI |

### Aromatic hydrocarbons

|    |                                    |                                 |           |                   |    |
|----|------------------------------------|---------------------------------|-----------|-------------------|----|
| 28 | 1,2,4-trimethyl-benzene            | C <sub>9</sub> H <sub>12</sub>  | 95-63-6   | 1277 <sup>c</sup> | TI |
| 29 | 1-ethyl-2,4-dimethyl benzene       | C <sub>10</sub> H <sub>14</sub> | 874-41-9  | 1348 <sup>d</sup> | TI |
| 30 | 1,3-bis(1,1-dimethylethyl)-benzene | C <sub>14</sub> H <sub>22</sub> | 1014-60-4 |                   | TI |

### Aldehydes

|    |                       |                                 |          |                   |    |
|----|-----------------------|---------------------------------|----------|-------------------|----|
| 31 | acetaldehyde          | C <sub>2</sub> H <sub>4</sub> O | 75-07-0  | 744 <sup>e</sup>  | TI |
| 32 | 4-methyl-benzaldehyde | C <sub>8</sub> H <sub>8</sub> O | 104-87-0 | 1656 <sup>f</sup> | TI |

### Norisoprenoid

|    |               |                                   |            |      |    |
|----|---------------|-----------------------------------|------------|------|----|
| 33 | β-damascenone | C <sub>13</sub> H <sub>18</sub> O | 23726-93-4 | 1830 | CI |
|----|---------------|-----------------------------------|------------|------|----|

### Terpenols

|    |               |                                   |          |      |    |
|----|---------------|-----------------------------------|----------|------|----|
| 34 | β-citronellol | C <sub>10</sub> H <sub>20</sub> O | 106-22-9 | 1779 | CI |
|----|---------------|-----------------------------------|----------|------|----|

### Ketone

|    |                      |                                  |           |                   |    |
|----|----------------------|----------------------------------|-----------|-------------------|----|
| 35 | 4-methyl-2-heptanone | C <sub>8</sub> H <sub>16</sub> O | 6137-06-0 | 1206 <sup>g</sup> | TI |
|----|----------------------|----------------------------------|-----------|-------------------|----|

### Unknowns

|       |                                              |  |  |  |    |
|-------|----------------------------------------------|--|--|--|----|
|       | F8, F10, F19, F22, F24, F27, F30, F40, F43,  |  |  |  |    |
| 36-58 | F45, F46, F47, F48, F50, F53, F54, F56, F77, |  |  |  | NI |
|       | F80, F83, F85, F86, F90                      |  |  |  |    |

---

*Non-significant strain effect*

### Alcohols



|    |                     |                                               |          |      |    |
|----|---------------------|-----------------------------------------------|----------|------|----|
| 59 | propanol            | C <sub>3</sub> H <sub>8</sub> O               | 71-23-8  | 1030 | CI |
| 60 | 3-ethoxy-1 propanol | C <sub>5</sub> H <sub>12</sub> O <sub>2</sub> | 111-35-3 | 1377 | CI |
| 61 | (Z)-3-hexen-1-ol    | C <sub>6</sub> H <sub>12</sub> O              | 928-96-1 | 1396 | CI |

#### Esters

|    |                 |                                               |          |      |    |
|----|-----------------|-----------------------------------------------|----------|------|----|
| 62 | ethyl butanoate | C <sub>6</sub> H <sub>12</sub> O <sub>2</sub> | 105-54-4 | 1028 | CI |
| 63 | ethyl hexanoate | C <sub>8</sub> H <sub>16</sub> O <sub>2</sub> | 123-66-0 | 1592 | CI |

#### Aromatic hydrocarbons

|    |                              |                                 |           |                   |    |
|----|------------------------------|---------------------------------|-----------|-------------------|----|
| 64 | 1-ethyl-3-methyl-benzene     | C <sub>9</sub> H <sub>12</sub>  | 620-14-4  | 1224 <sup>c</sup> | TI |
| 65 | 2-ethyl-1,4-dimethyl-benzene | C <sub>10</sub> H <sub>14</sub> | 1758-88-9 | 1343 <sup>d</sup> | TI |

#### Aldehydes

|    |                  |                                  |           |      |    |
|----|------------------|----------------------------------|-----------|------|----|
| 66 | nonanal          | C <sub>9</sub> H <sub>18</sub> O | 124-19-6  | 1375 | CI |
| 67 | 2,5-benzaldehyde | C <sub>9</sub> H <sub>10</sub> O | 5779-94-2 |      | TI |

#### Ketone

|    |            |                                  |          |      |    |
|----|------------|----------------------------------|----------|------|----|
| 68 | 2-nonanone | C <sub>9</sub> H <sub>18</sub> O | 821-55-6 | 1375 | CI |
|----|------------|----------------------------------|----------|------|----|

#### Terpenols

|    |           |                                   |           |      |    |
|----|-----------|-----------------------------------|-----------|------|----|
| 69 | terpineol | C <sub>10</sub> H <sub>18</sub> O | 8006-39-1 | 1690 | CI |
|----|-----------|-----------------------------------|-----------|------|----|

#### Unknowns

|       |                                              |  |  |  |    |
|-------|----------------------------------------------|--|--|--|----|
|       | F5, F13, F17, F20, F26, F31, F32, F41, F42,  |  |  |  |    |
| 70-90 | F52, F55, F64, F65, F66, F72, F73, F74, F79, |  |  |  | NI |
|       | F81, F84, F87                                |  |  |  |    |

<sup>a</sup> Umamo, K., Nakahara, K., Shoji, A. & Shibamoto, T. Aroma chemicals isolated and identified from leaves of *Aloe arborescens* Mill. Var. *natalensis* Berger. *J. Agric. Food Chem.* **47**, 3702-3705 (1999);

<sup>b</sup> Zhao, Y., Xu, Y., Li, J., Fan, W. & Jiang, W. Profile of volatile compounds in 11 brandies by headspace solid-phase microextraction followed by gas chromatography-mass spectrometry. *J. Food Sci.* **74**, 90-99, doi:10.1111/j.1750-3841.2008.01029.x (2009); <sup>c</sup> Toth, T. Use of capillary gas chromatography in collecting retention and chemical information for the analysis of complex petrochemical mixtures. *J. Chromatogr. A* **279**, 157-165 (1983); <sup>d</sup> Umamo, K., Hagi, Y., Nakahara, K., Shoji, A. & Shibamoto, T. Volatile chemicals identified in extracts from leaves of Japanese mugwort

(*Artemisia princeps* Pamp.). *J. Agric. Food Chem.* **48**, 3463–3469 (2000); <sup>e</sup>Umano, K., Shoji, A., Hagi, Y. & Shibamoto, T. Volatile constituents of peel of quince fruit, *Cydonia oblonga* Miller. *J. Agric. Food Chem.* **34**, 593–596 (1986); <sup>f</sup>Steullet, P. & Guerin, P. M. Identification of vertebrate volatiles stimulating olfactory receptors on tarsus I of the tick *Amblyomma variegatum* Fabricius (Ixodidae). *J. Comp. Physiol. A* **174**, 27-38 (1994); <sup>g</sup>Canuti, V. et al. Headspace solid-phase microextraction - gas chromatography - mass spectrometry for profiling free volatile compounds in Cabernet Sauvignon grapes and vines. *J. Chromatogr. A* **1216**, 3012-3022 (2009); <sup>h</sup>Gurbuz, O., Rouseff, J. M. & Rouseff, R. L. Comparison of aroma volatiles in commercial Merlot and Cabernet Sauvignon wines using gas chromatography - Olfactometry and gas chromatography - Mass spectrometry. *Journal of Agricultural and Food Chemistry J. Agric. Food Chem.* **54**, 3990-3996 (2006); <sup>i</sup>Karlsson, M. F. et al. Plant odor analysis of potato: response of guatemalan moth to above- and background potato volatiles. *J. Agric. Food Chem.* **57**, 5903-5909 (2009).

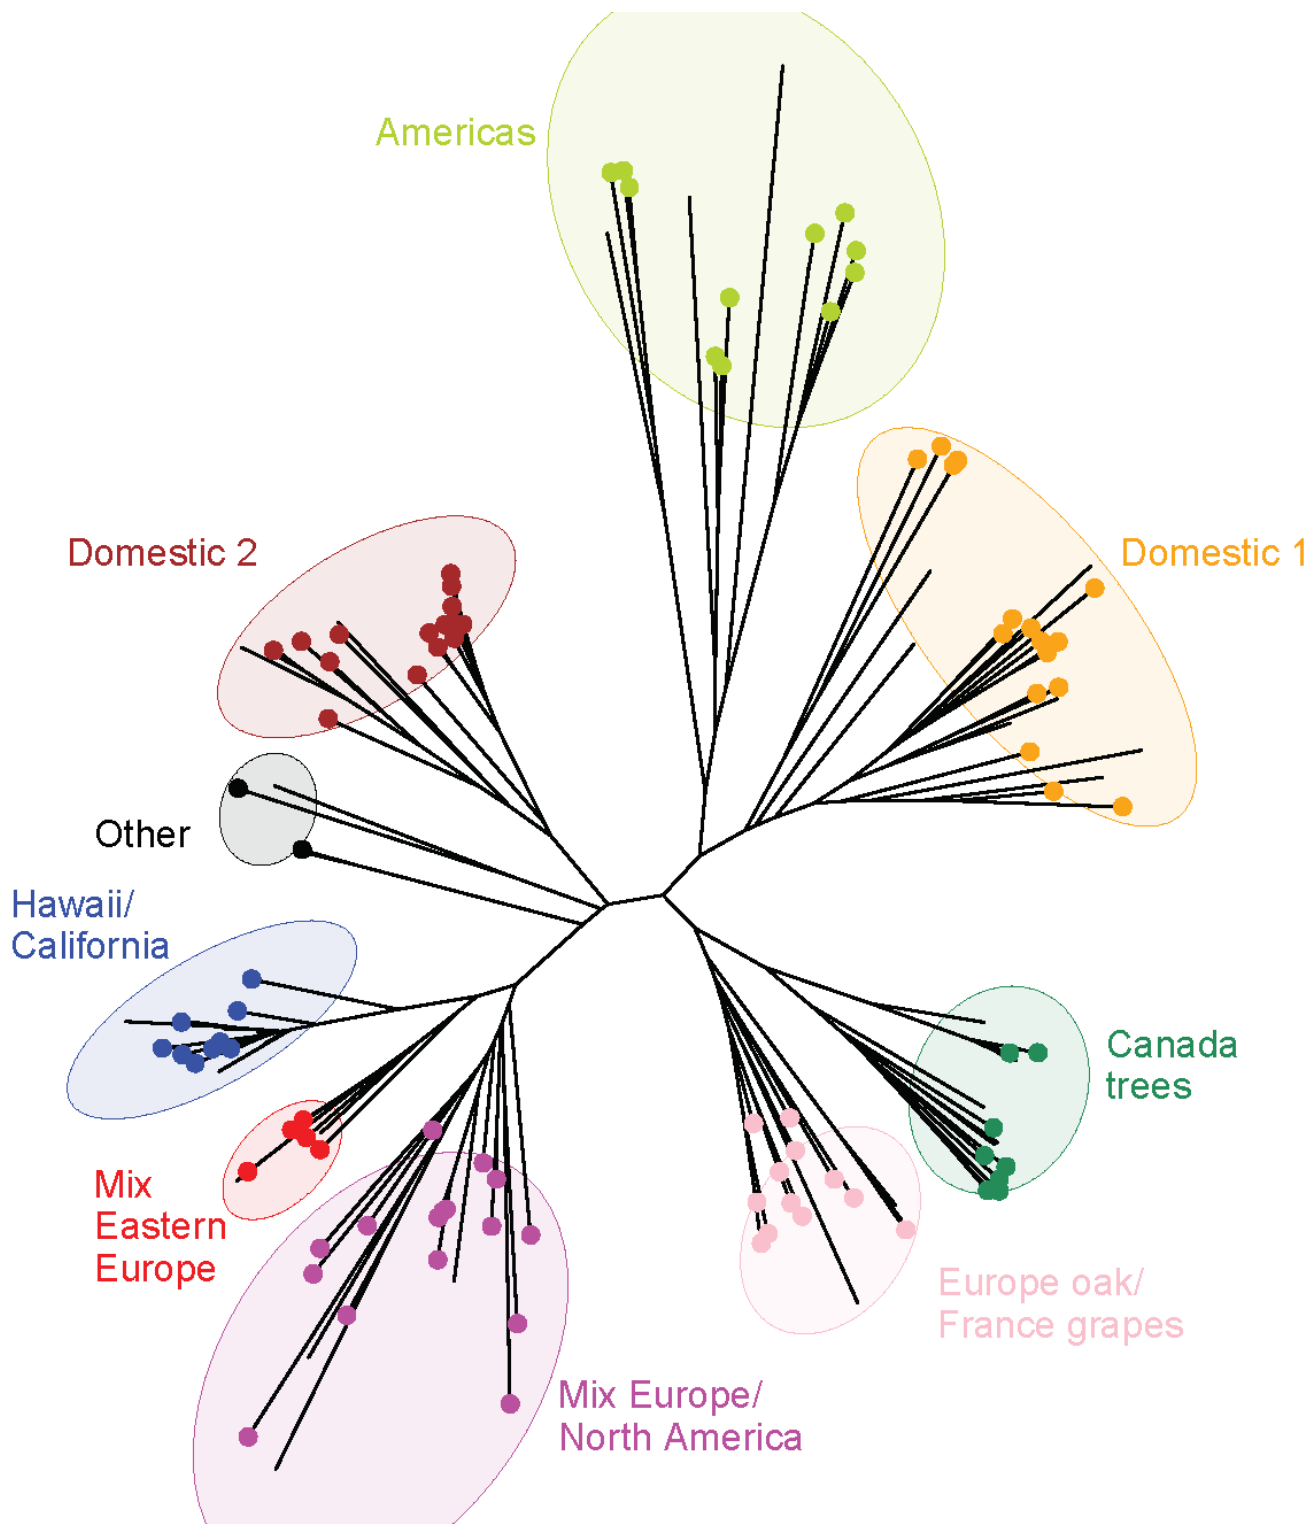

**Supplementary Figure 1. Genetic relationships between 94 phenotyped *Lachancea thermotolerans* determined using 14 microsatellite markers.**

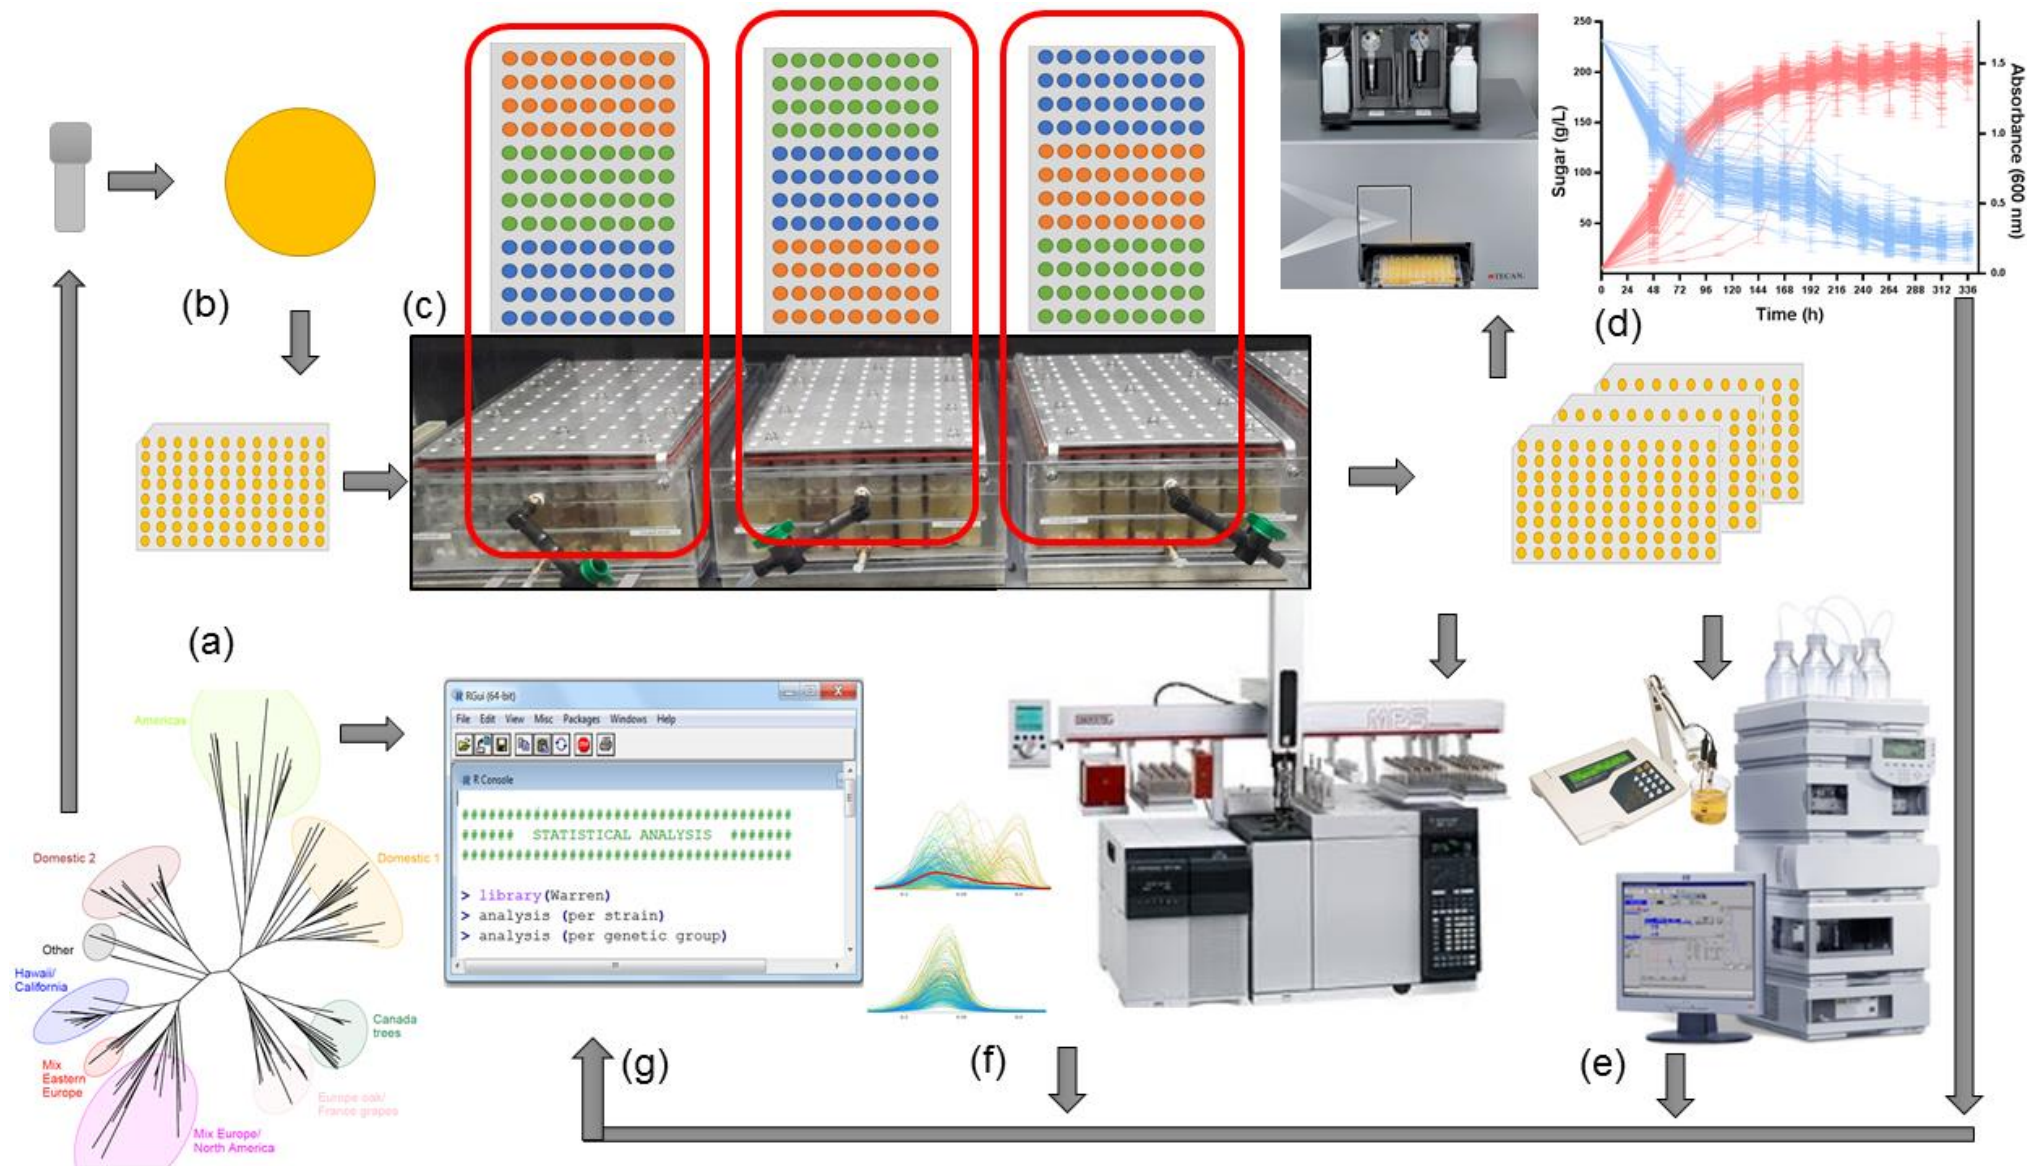

**Supplementary Figure 2. Schematic representation of the *L. thermotolerans* phenotyping workflow:** The cryo-cultures of 94 *L. thermotolerans* strains belonging to nine genetic groups (a) according to Hranilovic et al. (2017) were grown on YPD agar plates and in YPD broth to establish the inoculation cultures for Chardonnay grape juice fermentations (b). The triplicate fermentations were set up in ‘Tee-bot v.2.0’ using three 96-fermentor blocks (c). Each block contained one biological replicate, with row-wise randomisation between the blocks (indicated with orange, green and blue colour). Such randomisation was maintained for all downstream analysis. Fermentations were monitored regularly via OD<sub>600</sub> and sugar consumption (d). The final wines were analysed for their pH values, and concentrations of organic acids, hexoses and alcohols via HPLC (e), and volatile composition via SPME-GC-MS (f). All the measured and derived parameters were subjected to appropriate univariate and multivariate statistical analysis (g).

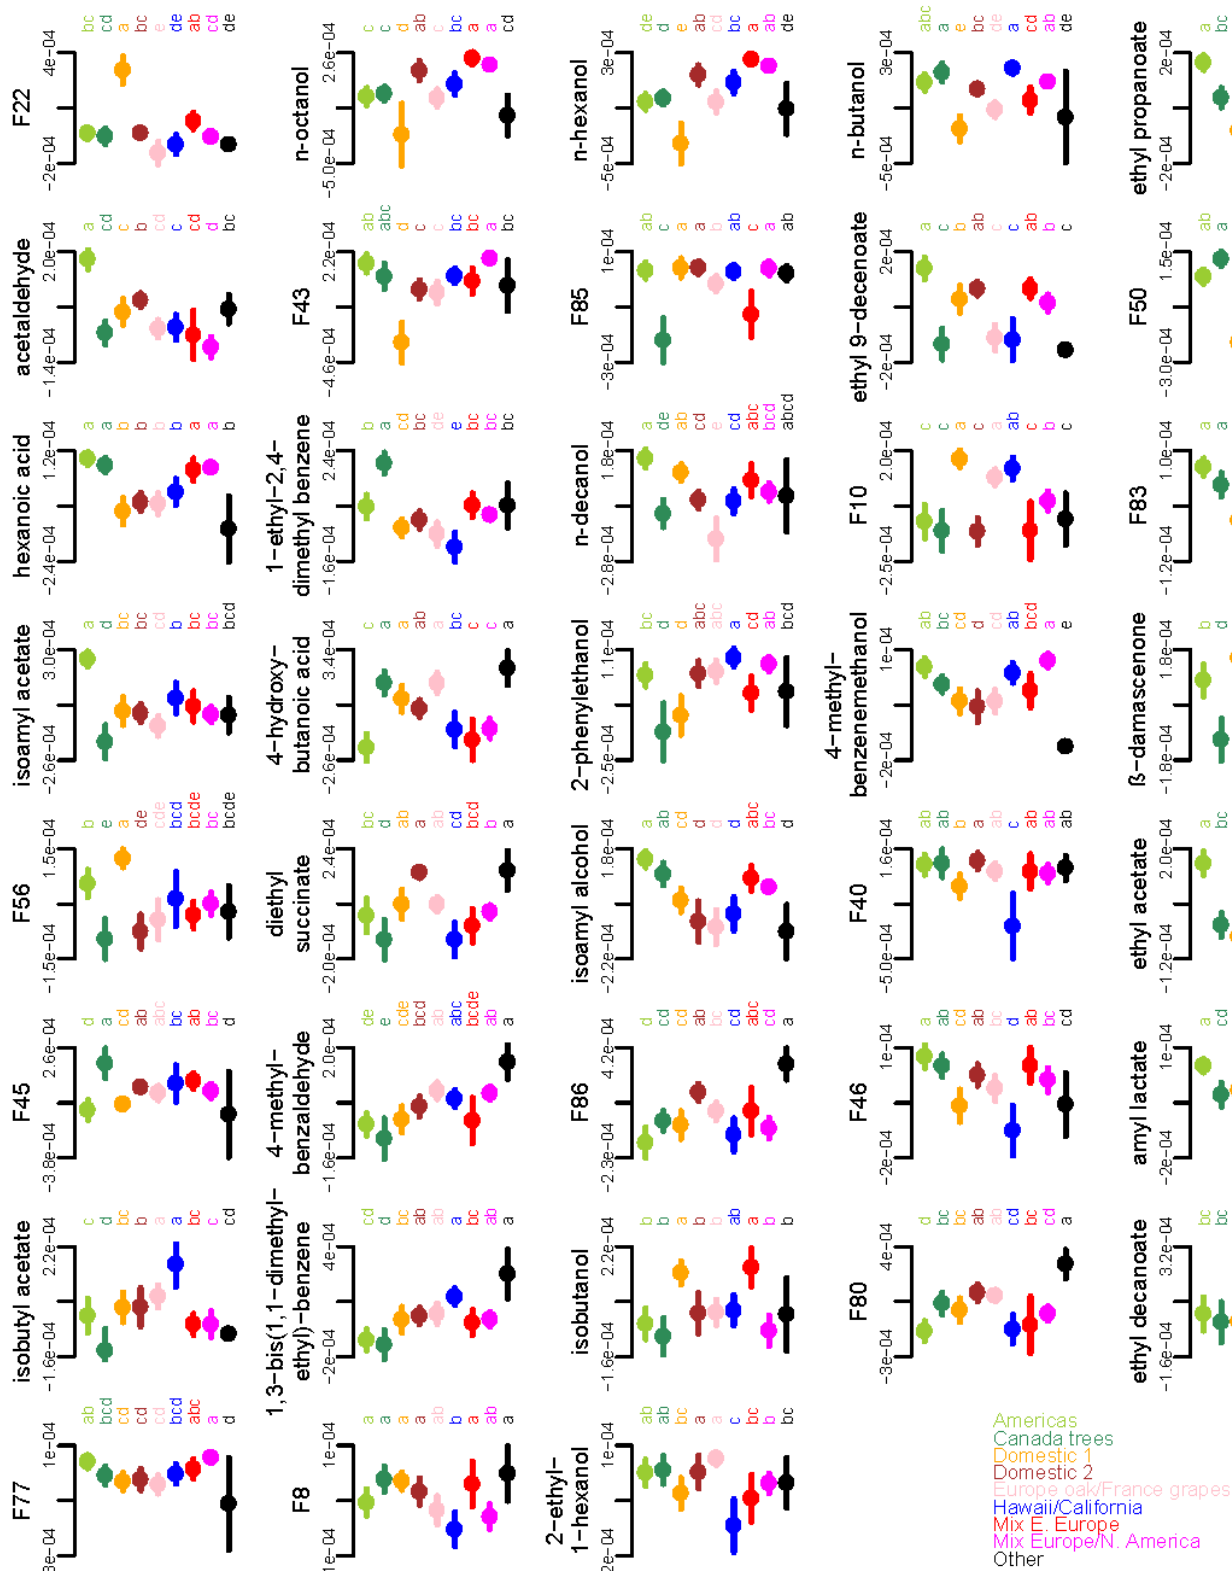

**Supplementary Figure 3. The analysed volatile compounds displaying a significant genetic group effect.** Dots and bars represent means and standard errors, respectively. Top letters represent significance groups as defined by Kruskal-Wallis test (*agricolae* package,  $p$ -value < 0.05 after Benjamini & Hochberg adjustment for multiple comparisons).

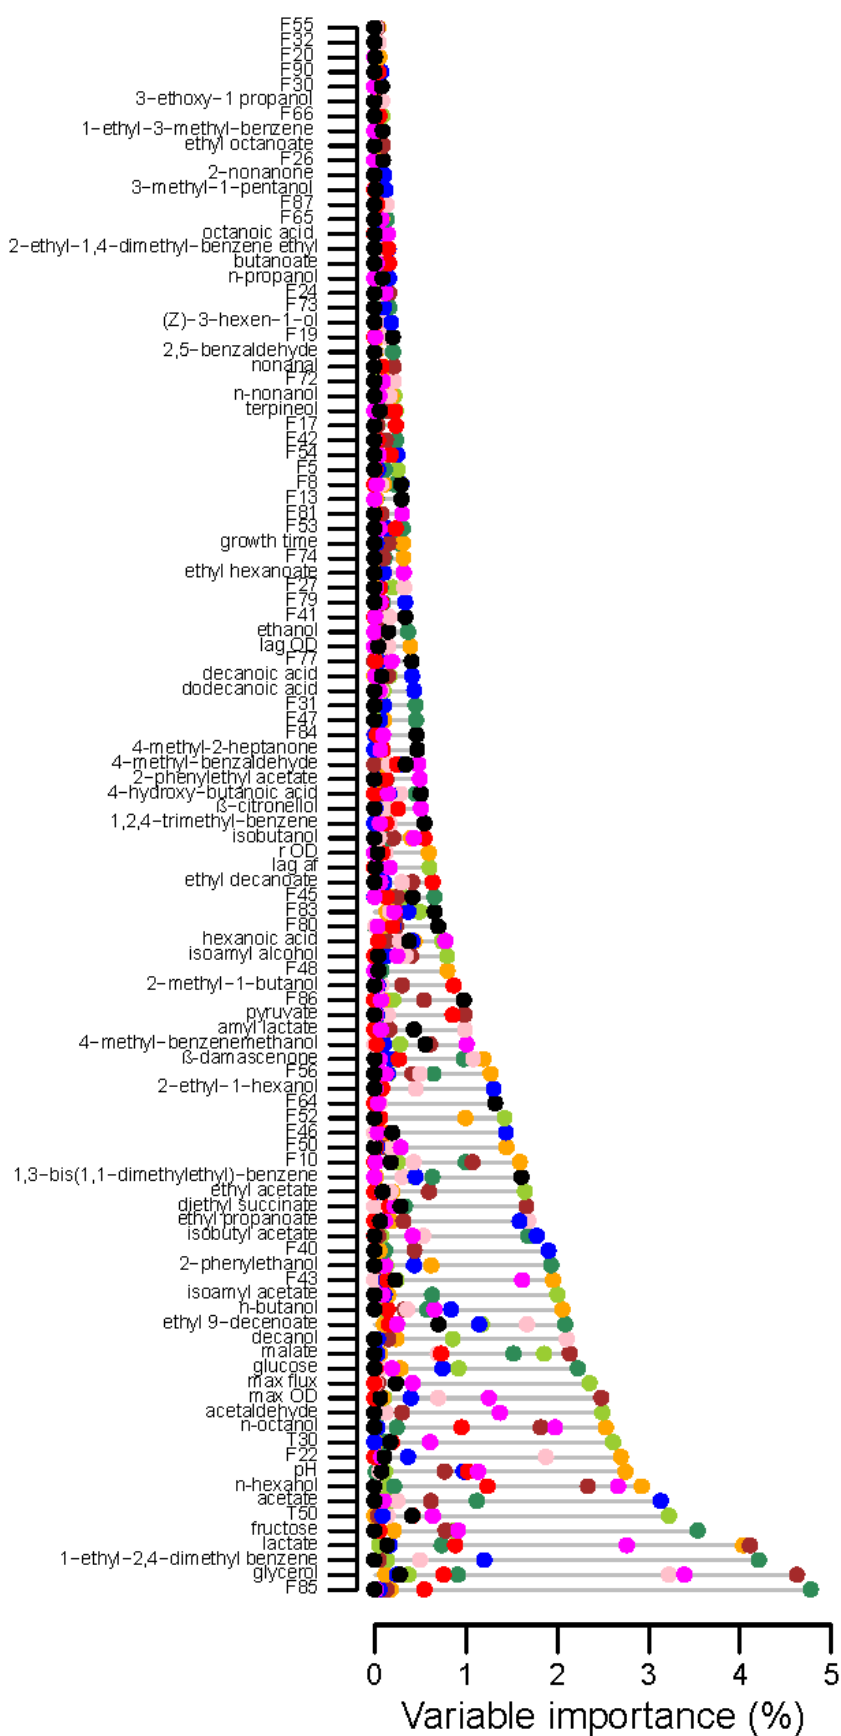

**Supplementary Figure 4. The importance of all 107 variable subjected to LDA.**

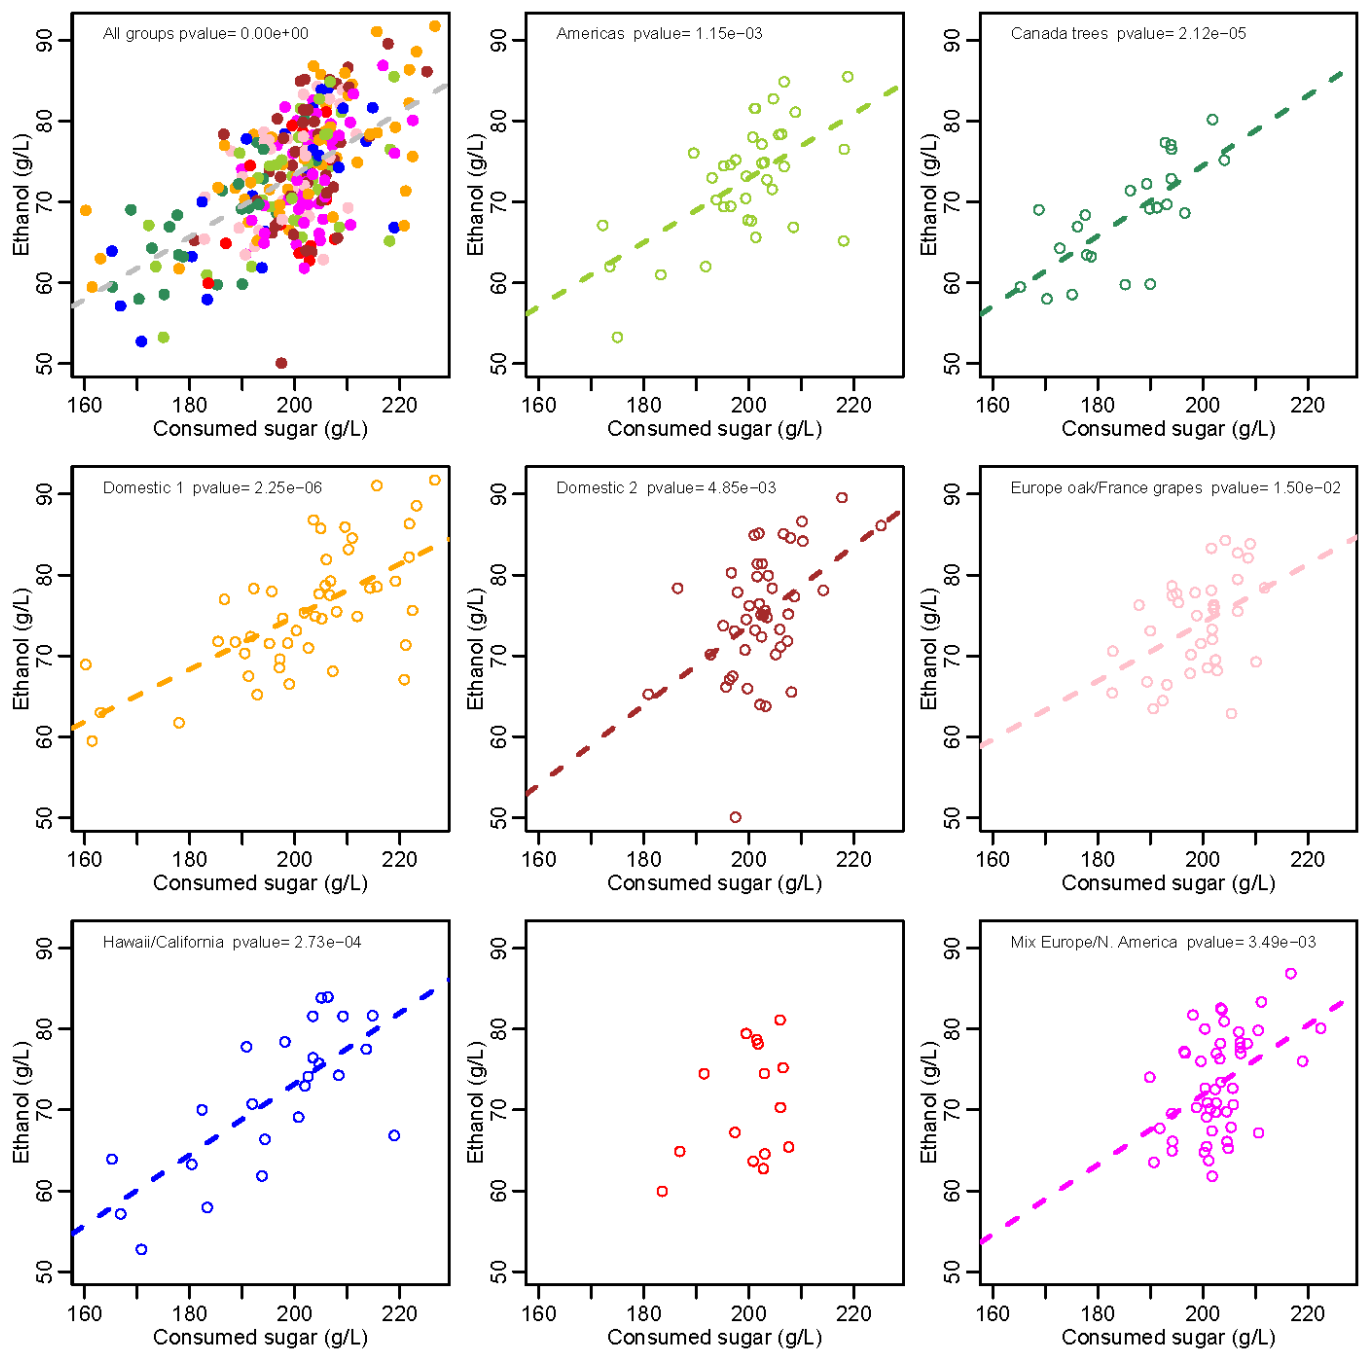

**Supplementary Figure 5. Spearman's correlation test between the selected metabolites: consumed sugar and ethanol.**



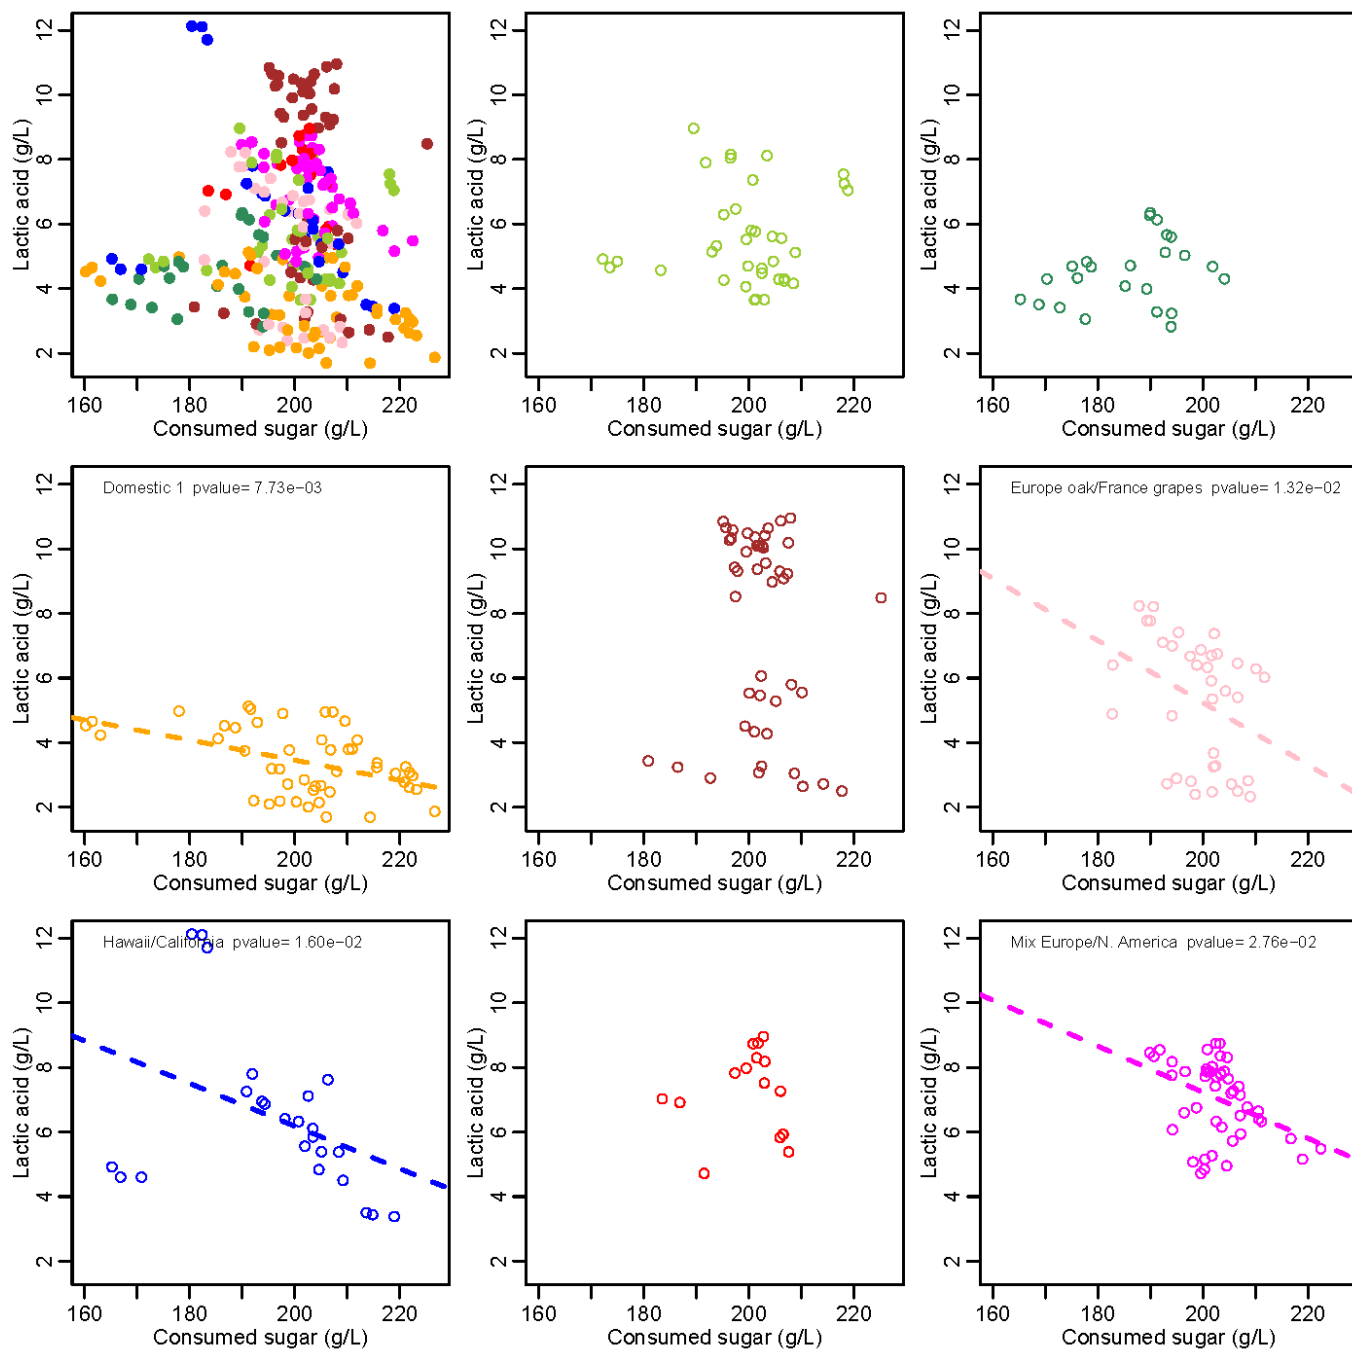

**Supplementary Figure 6. Spearman's correlation test between the selected metabolites: consumed sugar and lactic acid.**

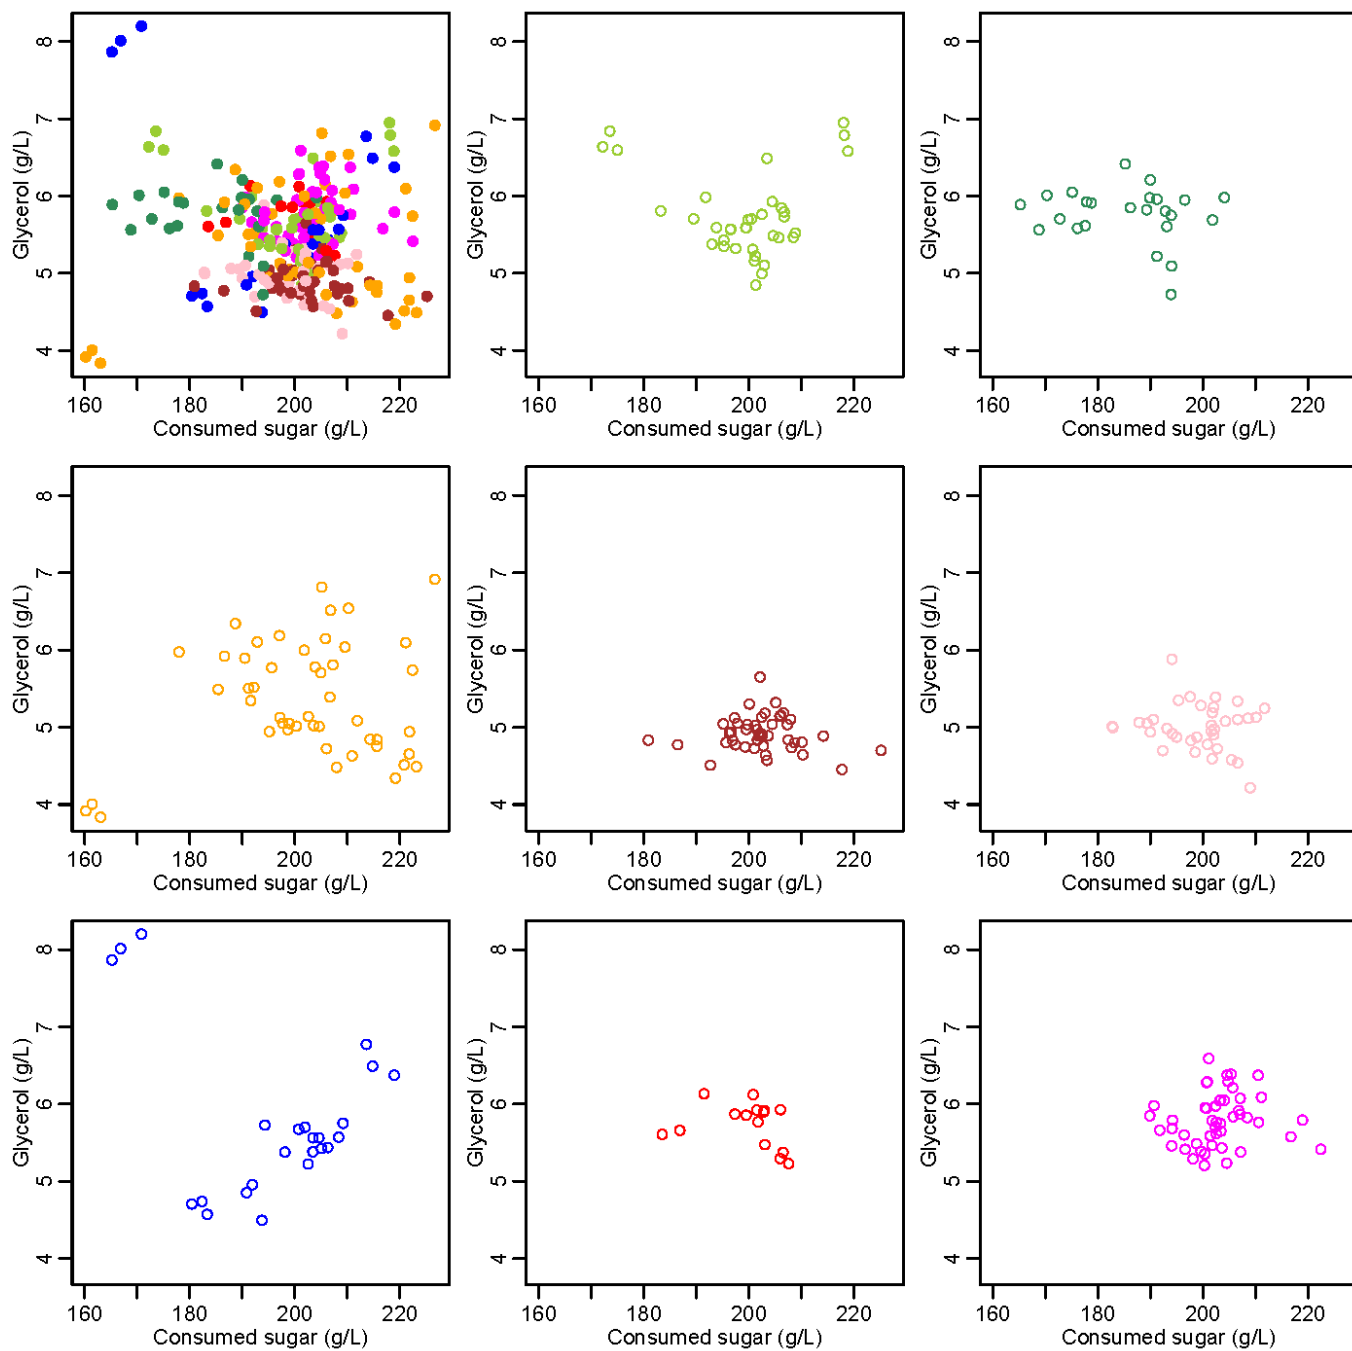

**Supplementary Figure 7. Spearman's correlation test between the selected metabolites: consumed sugar and glycerol.**

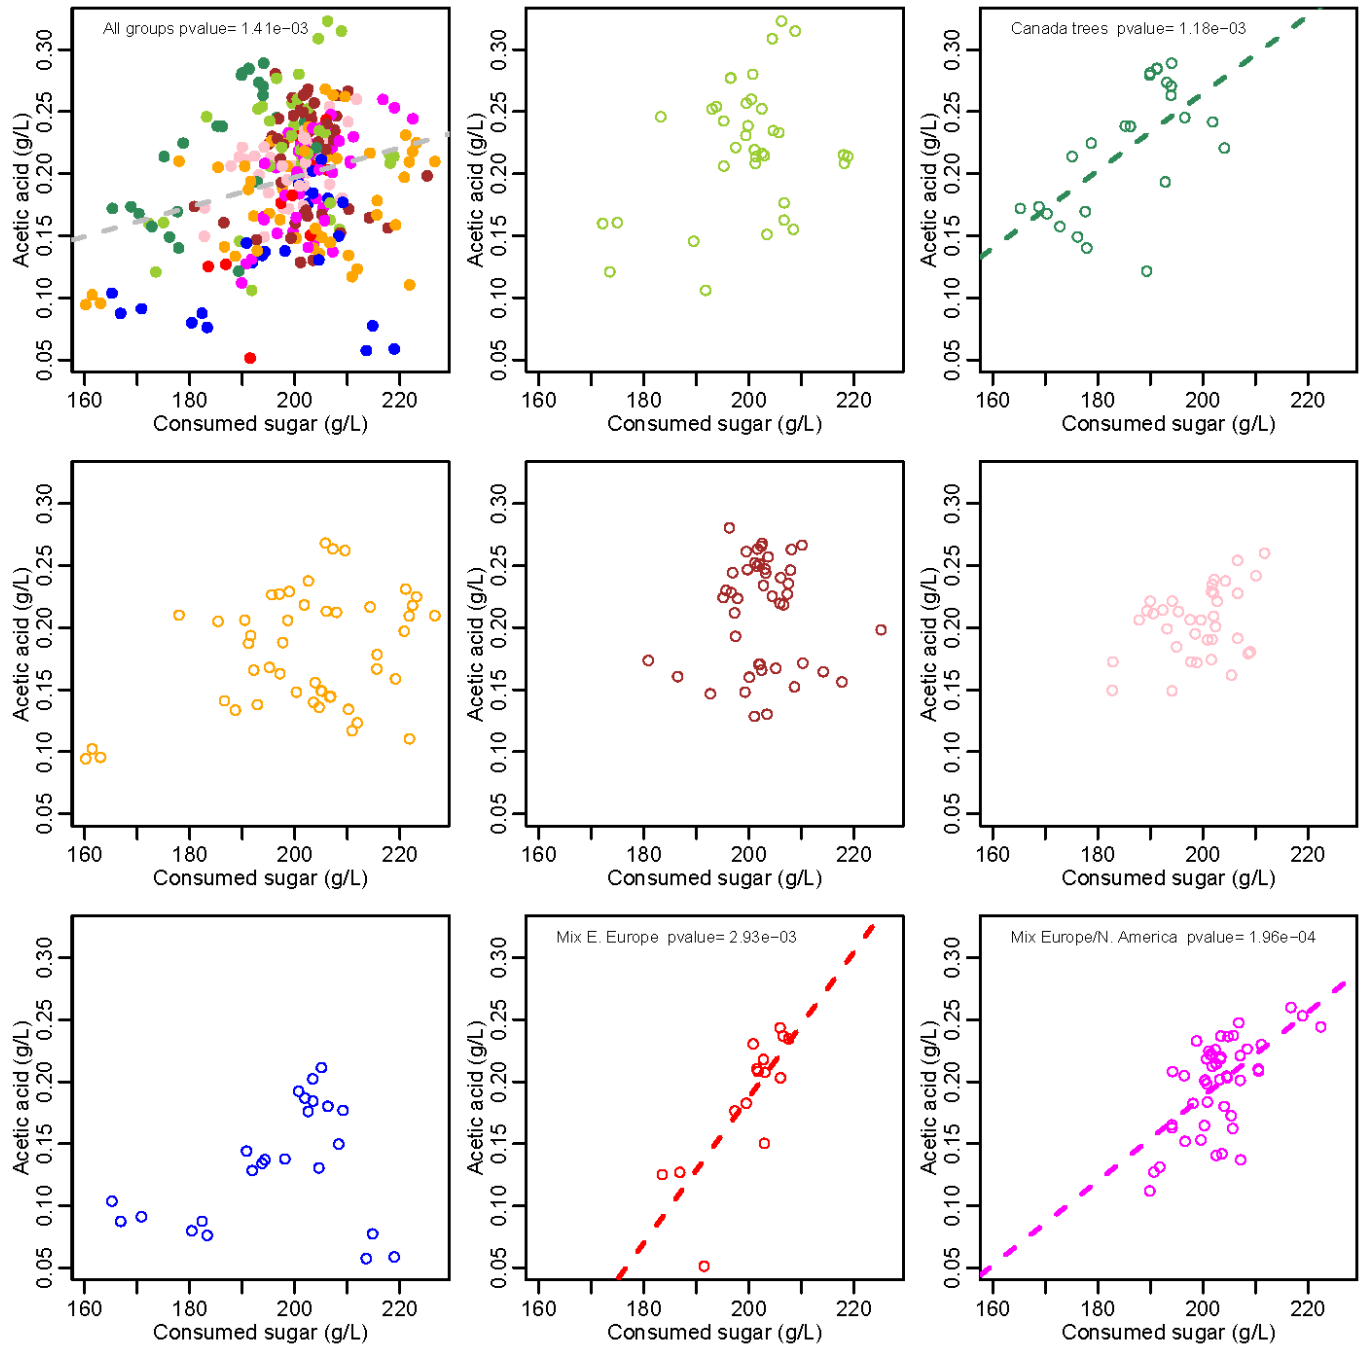

**Supplementary Figure 8. Spearman's correlation test between the selected metabolites: consumed sugar and acetic acid.**

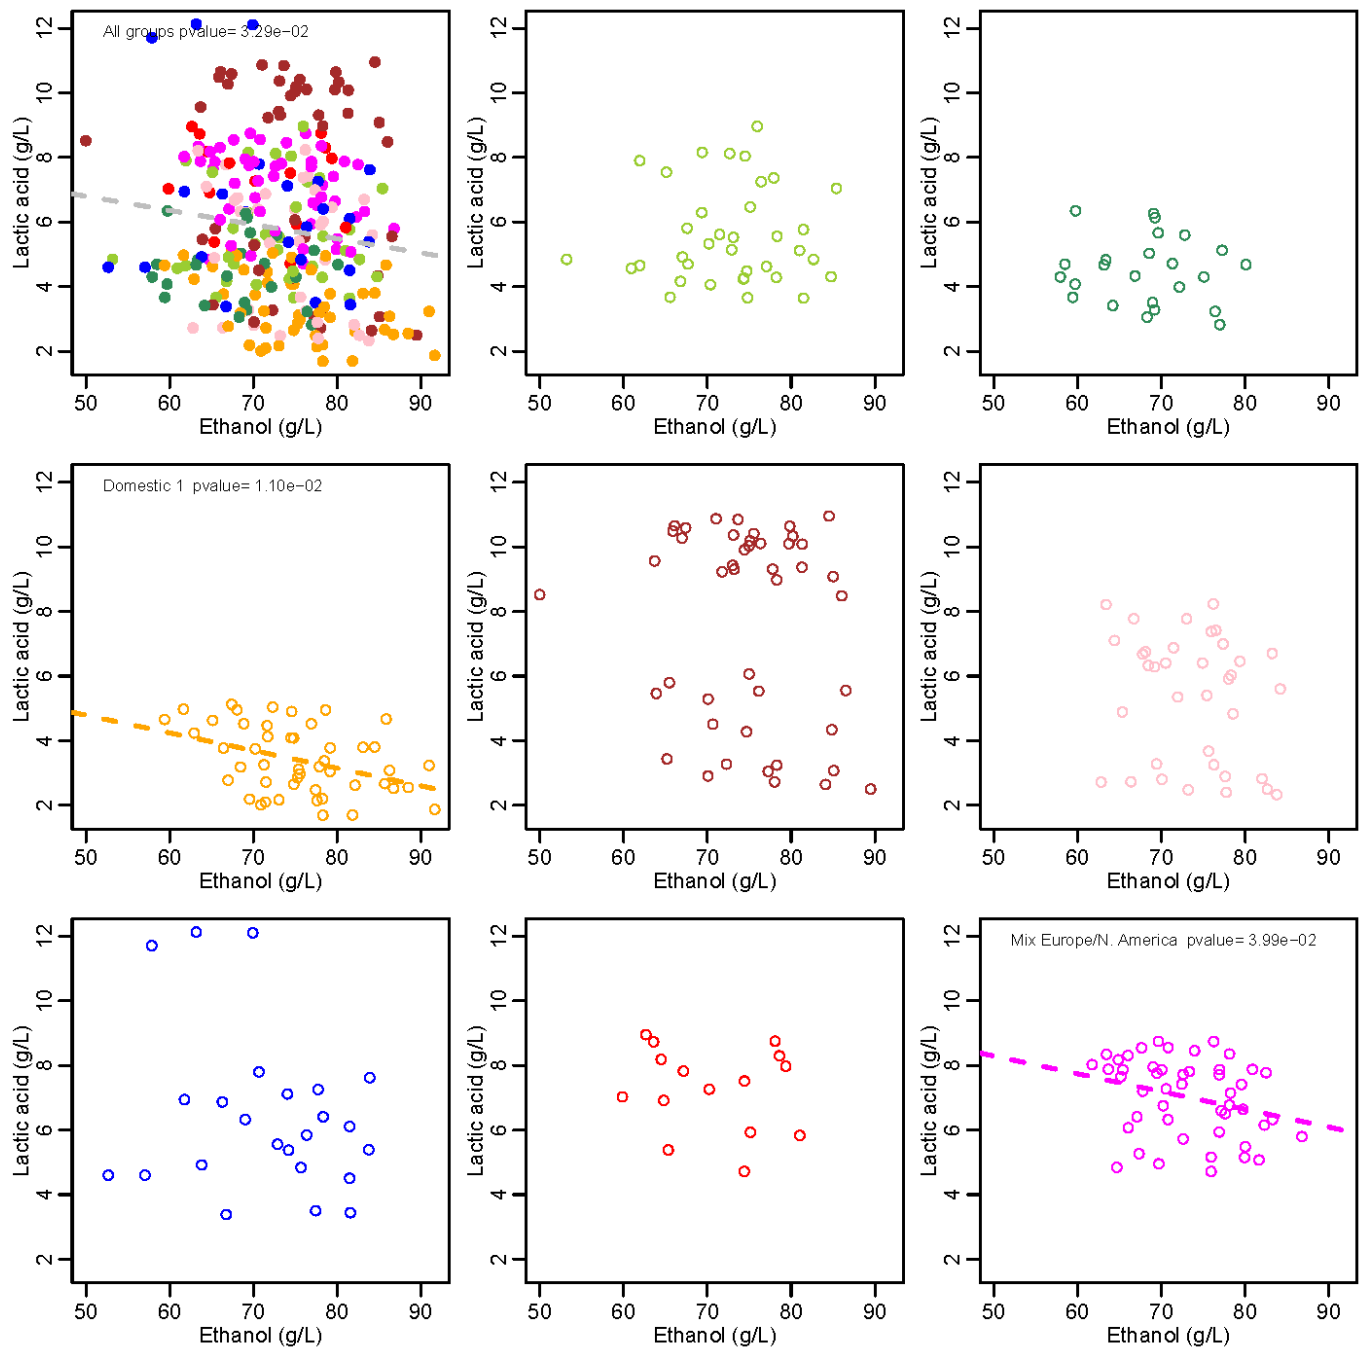

**Supplementary Figure 9. Spearman's correlation test between the selected metabolites: ethanol and lactic acid.**

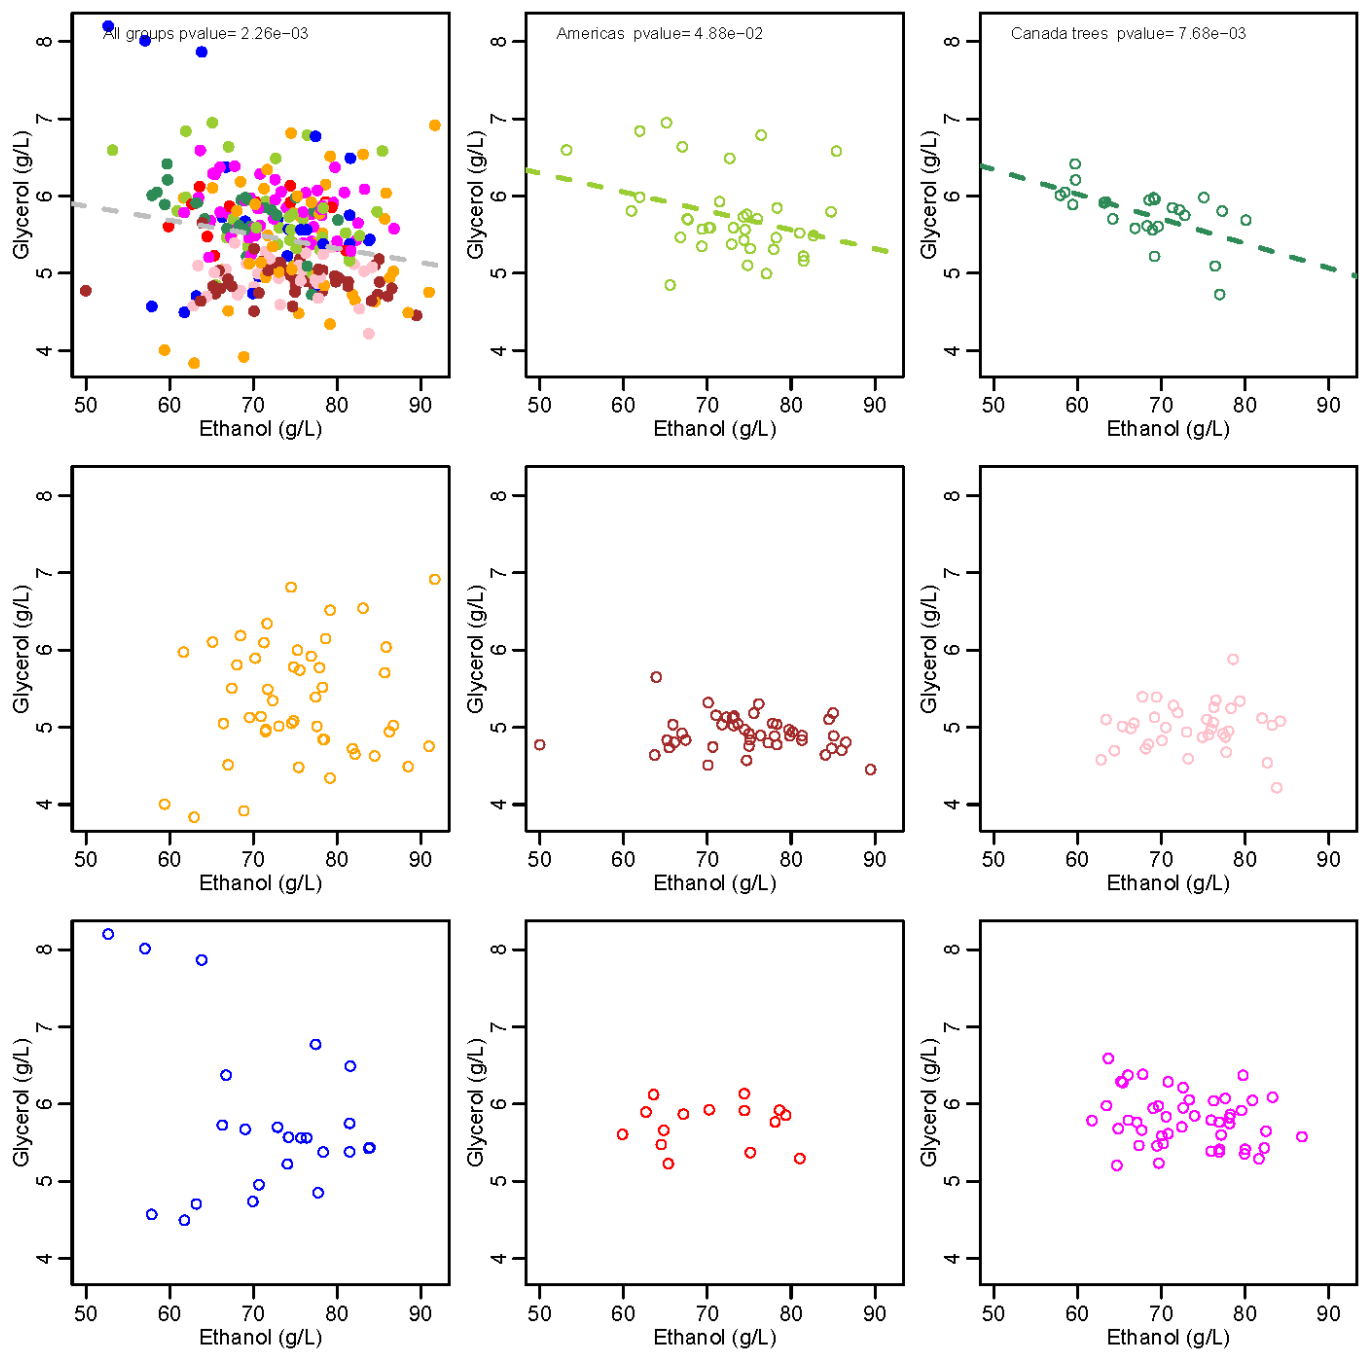

**Supplementary Figure 10. Spearman's correlation test between the selected metabolites: ethanol and glycerol.**

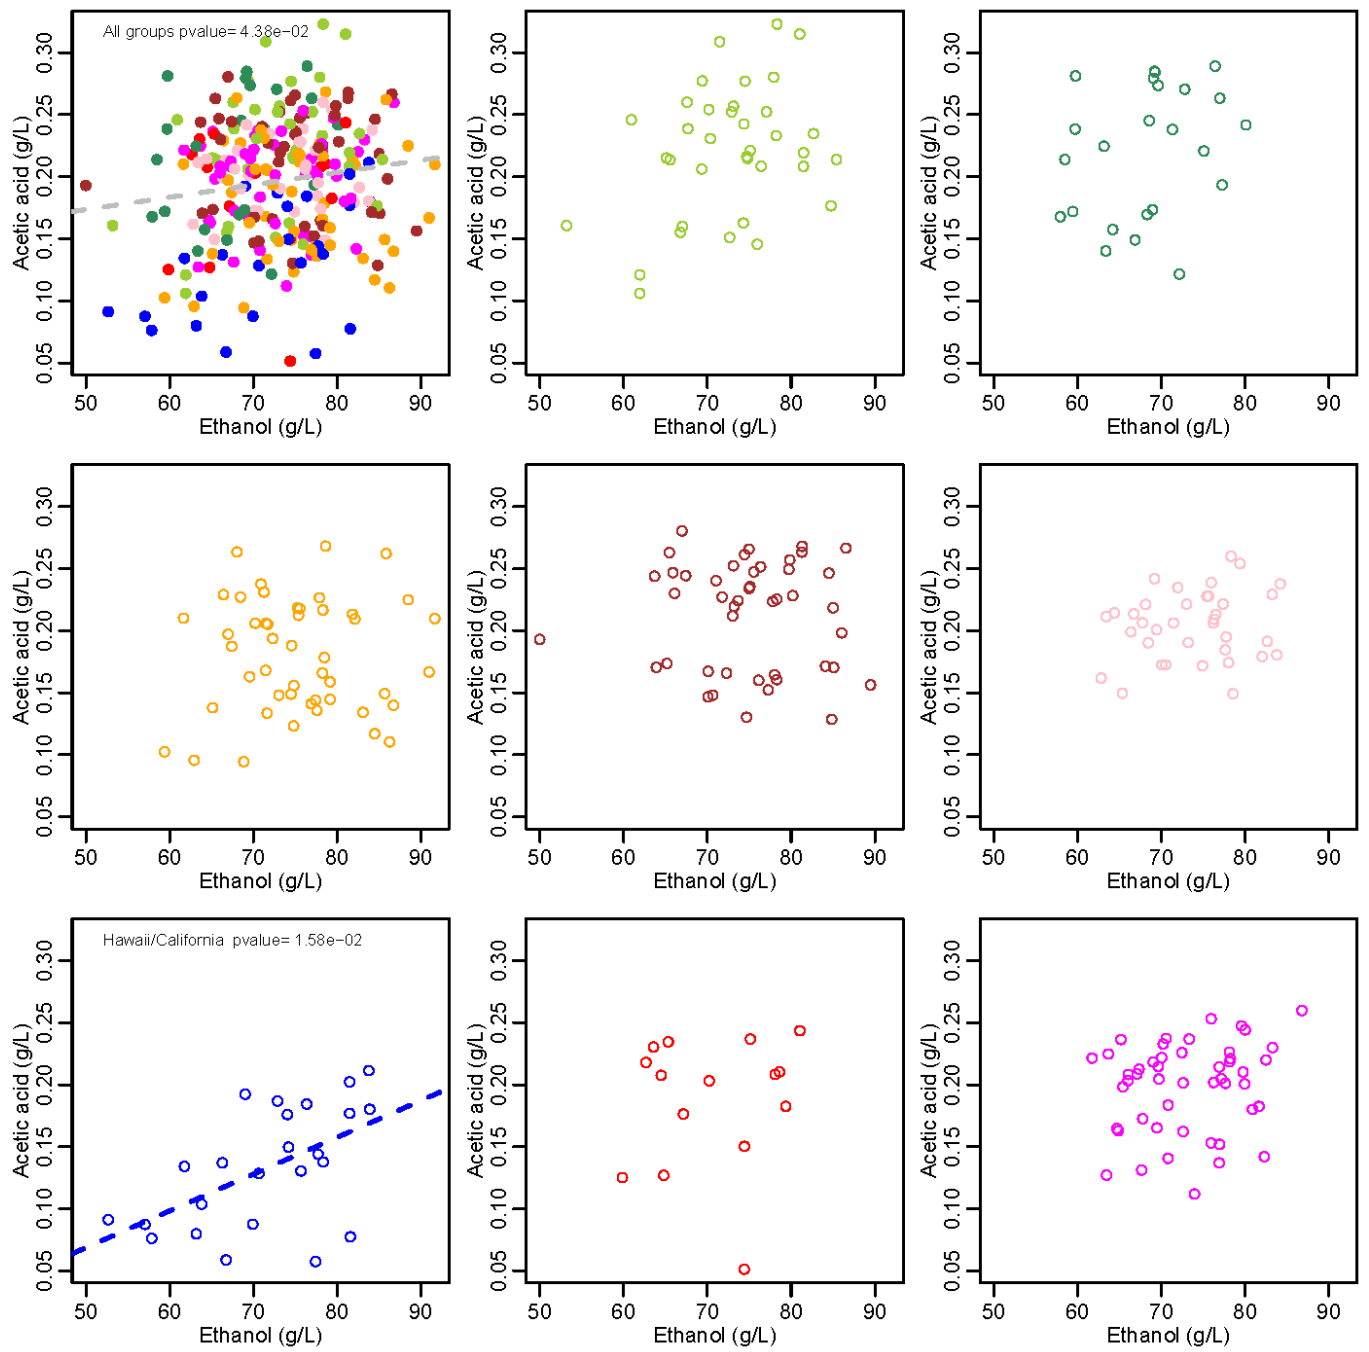

**Supplementary Figure 11. Spearman's correlation test between the selected metabolites: ethanol and acetic acid.**

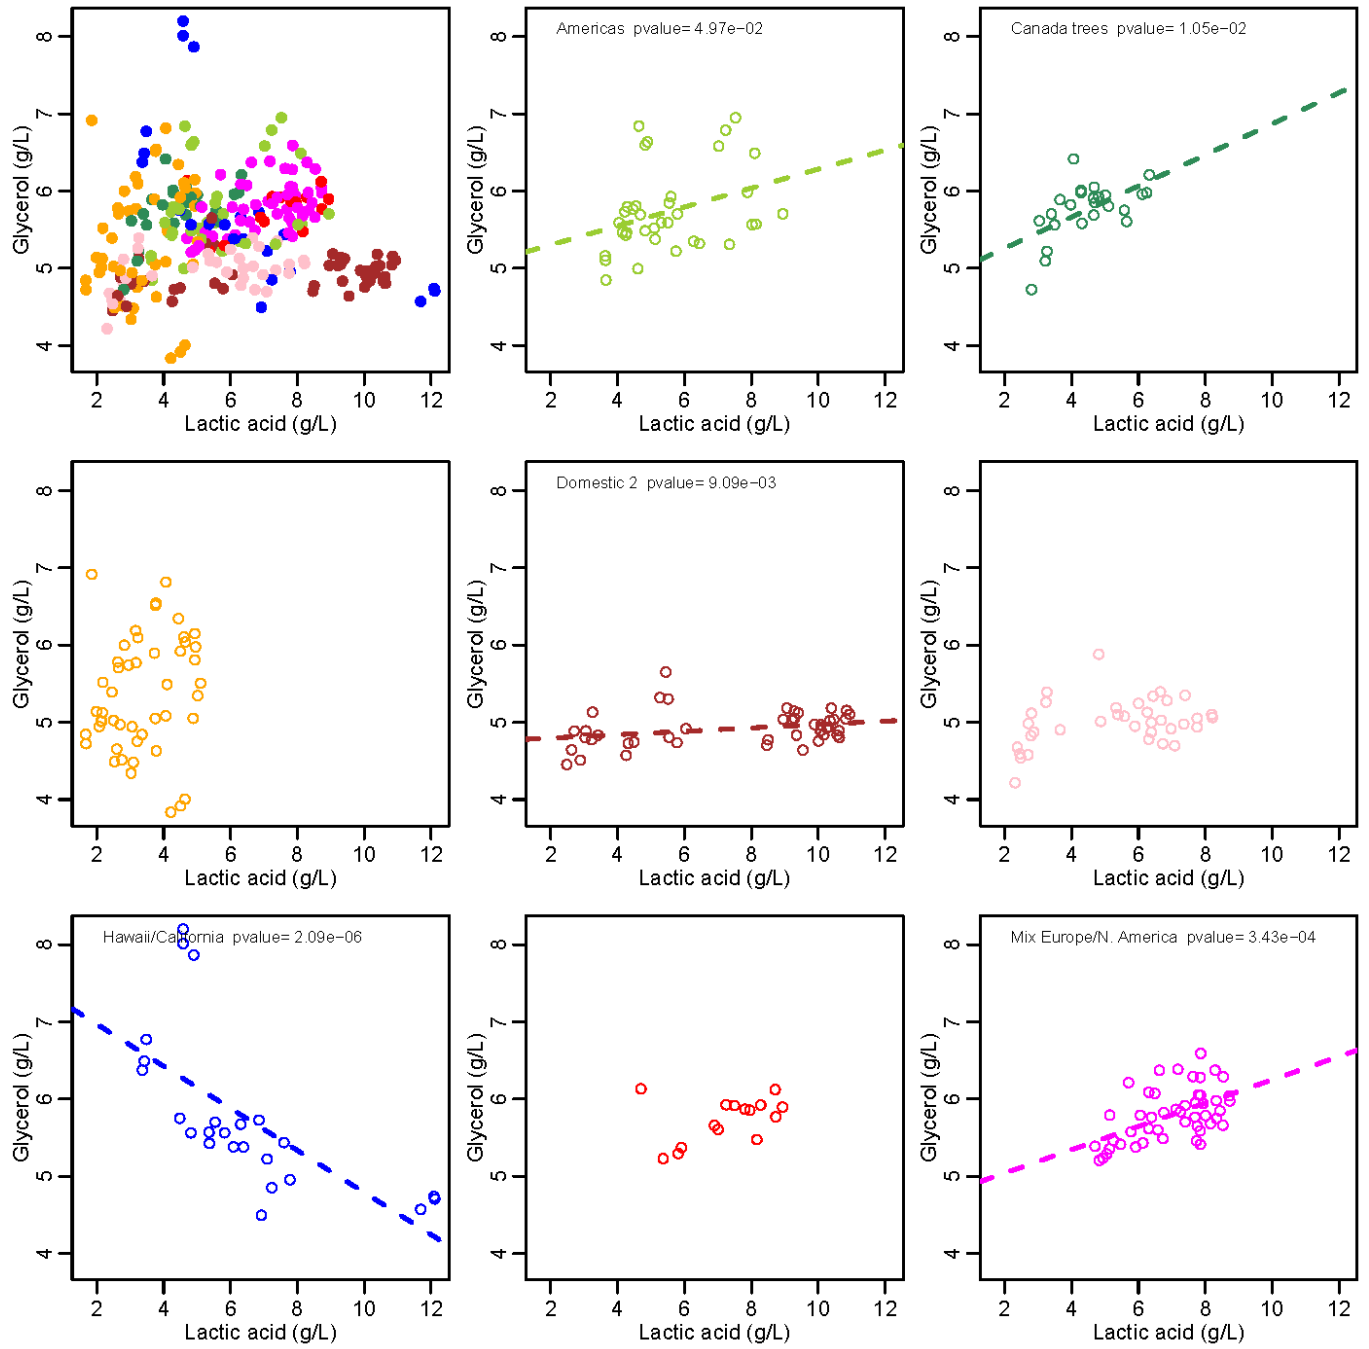

**Supplementary Figure 12. Spearman's correlation test between the selected metabolites: lactic acid and glycerol.**

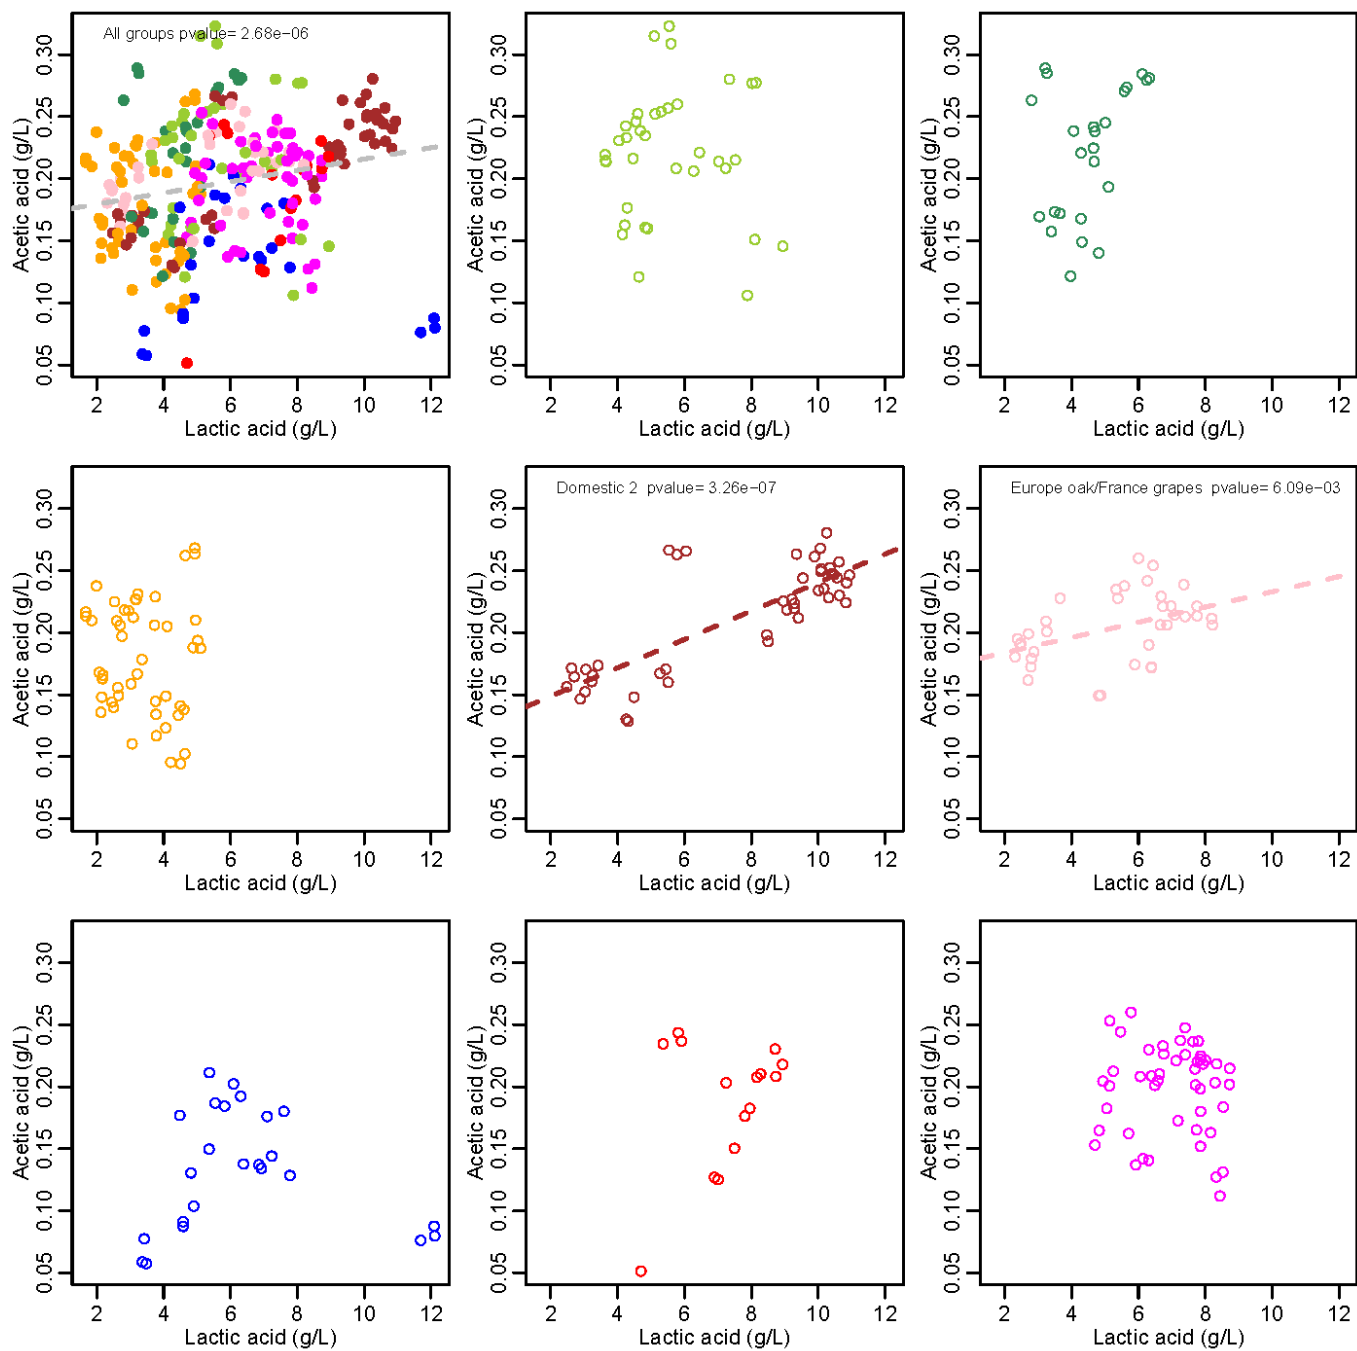

**Supplementary Figure 13. Spearman's correlation test between the selected metabolites: lactic acid and acetic acid.**



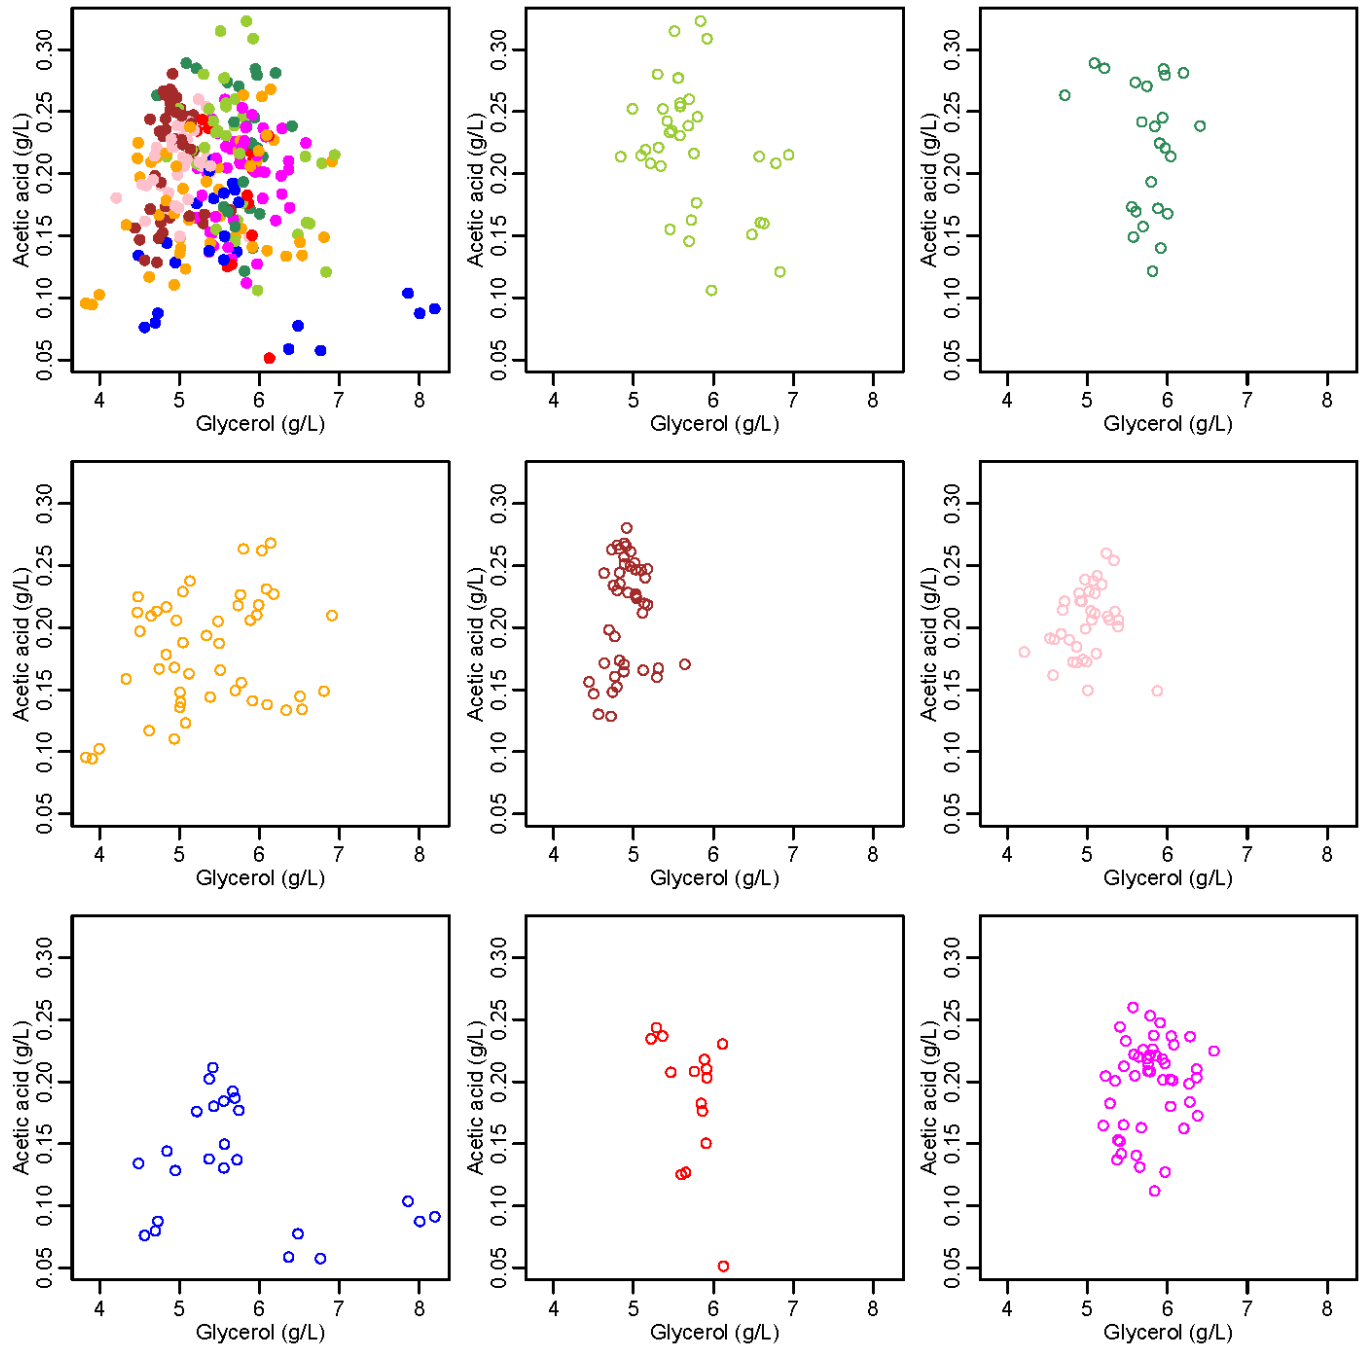

**Supplementary Figure 14. Spearman's correlation test between the selected metabolites: glycerol and acetic acid.**
